# Supplementary material for: The resilience of constructed wetlands treating greywater: the effect of operating conditions and seasonal temperature decline
Source: Royal Society of Chemistry journal article supplement (doi:10.1039/d4ew00637b), 2024-01-01
Supplement: d4ew00637b1.xlsx [file d4ew00637b1.xlsx]

## Sheet: Batch 1
Batch I
	Fluoride	Chloride	Nitrite	Bromide	Nitrate	Phosphate	Sulfate	Ammonium dilution 50x (abs)	Conc	TN	TC	IC	TOC	pH	Conductivity
1	0.432	0.138	0.01	0.02	0	0.095	228.067	0.0549	0.0603839	2.022	28.48	7.66	20.82	7.13	1514		S+P+A-Am
2	0.02	108.858	0.01	0.063	0.732	0.05	254.433	0.0577	0.063207	1.602	89.86	51.48	38.38	7.14	1436		S+P+A-Am
3	0.267	151.325	0.01	0.02	0.197	0.05	213.114	0.032	0.0372951	1.243	27.09	5.25	21.84	7.53	1194		S+P+A-Am
4	0.038	145.43	0.014	0.115	4.311	0.05	49.876	1.9864	2.00781	4.347	6.92	-0.68	6.92	6.28	726		M+P+A-Am
5	0.034	109.028	0.01	0.093	1.376	0.05	29.546	0.6021	0.612097	1.473	5.03	-0.85	5.03	6.12	497		M+P+A-Am
6	0.036	135.171	0.01	0.088	4.695	0.05	42.919	1.5093	1.52678	3.645	6.42	-0.64	6.42	6.02	655		M+P+A-Am
7	0.21	114.415	0.01	0.075	0.346	0.05	260.28	0.3595	0.367496	9.262	15.27	-0.1	15.27	7.14	1162		S-P+A-Am
8	0.19	99.104	0.004	0.062	16.421	0.05	201.542	1.968	1.98926	1.866	26.32	7.14	19.18	7.09	910		S-P+A-Am
9	0.177	127.373	0.033	0.096	16.592	0.05	239.197	1.3885	1.40498	8.913	21.94	1.8	20.14	6.93	1155		S-P+A-Am
10	0.035	101.751	0.01	0.118	47.513	0.05	22.26	3.0324	3.06244	18.086	7.49	-0.72	7.49	5.8	546		M-P+A-Am
11	0.038	91.562	0.01	0.171	51.648	0.389	16.313	2.5225	2.54834	19.024	8.96	-0.82	8.96	5.61	491		M-P+A-Am
12	0.036	106.405	0.01	0.153	51.66	0.05	14.727	2.1234	2.14594	17.608	5.53	-1.03	5.53	5.41	549		M-P+A-Am
13	0.206	135.965	0.01	0.073	2.682	0.05	386.381	0.3684	0.37647	2.731	76.02	45.32	30.7	6.91	1923		S+P+A+Am
14	0.261	141.596	0.01	0.061	1.602	0.05	83.216	0.2707	0.277964	1.747	70.45	39.2	31.25	7.2	1057		S+P+A+Am
15	0.188	158.788	0.557	0.042	4.662	0.05	108.72	0.1448	0.151025	2.622	21.71	5.87	15.84	7.2	975		S+P+A+Am
16	0.02	136.688	0.015	0.071	11.324	0.05	35.519	1.4844	1.50167	5.451	9.91	3.65	6.26	5.83	693		M+P+A+Am
17	0.038	162.264	0.01	0.115	3.919	0.05	42.997	1.3854	1.40186	3.452	6.81	0.56	6.25	6.14	811		M+P+A+Am
18	0.038	164.544	0.01	0.085	1.592	0.05	35.908	0.2816	0.288954	1.026	6.64	1.08	5.56	5.52	801		M+P+A+Am
19	0.21	146.957	0.37	0.068	20.555	0.05	172.772	3.304	3.33628	15.994	20.41	0.08	20.33	6.53	1063		S-P+A+Am
20	0.202	129.62	0.233	0.061	21.136	0.05	167.015	2.9995	3.02927	16.625	16.81	0.3	16.51	6.7	967		S-P+A+Am
21	0.171	144.405	0.016	0.071	20.35	0.05	178.044	3.0765	3.1069	15.314	17.47	-0.63	17.47	6.25	1066		S-P+A+Am
22	0.035	133.905	0.015	0.097	54.614	0.05	17.246	3.6476	3.68271	23.559	7.83	-0.83	7.83	5.45	701		M-P+A+Am
23	0.02	125.048	0.019	0.098	54.122	0.05	10.794	3.562	3.59641	25.235	8.54	-1.01	8.54	5.35	645		M-P+A+Am
24	0.02	130.439	0.015	0.108	56.647	0.05	9.292	3.2948	3.327	25.758	9.08	-1.08	9.08	5.27	673		M-P+A+Am
25	0.242	131.257	0.018	0.091	2.552	0.05	113.804	0.3638	0.371832	2.109	85.22	50.85	34.37	7.15	215		S+P-A-Am
26	0.269	131.057	0.01	0.012	1.79	0.05	129.263	0.1171	0.123097	2.423	170.26	95.09	75.18	7.3	1532		S+P-A-Am
27	0.266	122.706	0.01	0.09	4.056	0.05	129.263	0.3436	0.351465	2.473	127.95	84	43.95	7.47	1375		S+P-A-Am
28	0.02	117.718	0.058	0.098	24.709	0.05	52.932	3.0738	3.10418	13.089	12.92	2.81	10.12	6.63	678		M+P-A-Am
29	0.02	135.372	0.042	0.088	13.83	0.05	64.162	1.7366	1.75595	7.128	11.05	1.29	9.77	5.9	711		M+P-A-Am
30	0.02	134.241	0.057	0.101	16.782	0.05	68.891	2.2023	2.22549	8.368	10.52	2.56	7.96	6.06	729		M+P-A-Am
31	0.153	73.752	0.01	0.092	0.223	0.05	334.011	0.4548	0.463582	1.391	37.65	21.45	16.2	7.05	1384		S-P-A-Am
32	0.205	93.622	0.01	0.084	1.071	0.05	392.469	1.3081	1.32392	3.39	36.28	17.94	18.34	7.05	1639		S-P-A-Am
33	0.285	88.958	0.01	0.08	0.1	0.635	375.549	1.8066	1.82653	4.132	34.12	18.35	15.77	7.17	1546		S-P-A-Am
34	0.033	99.98	0.116	0.123	0.694	0.05	21.168	2.207	2.23023	14.513	8.51	-0.2	8.51	6.25	543		M-P-A-Am
35	0.033	99.98	0.037	0.123	46.428	0.05	15.945	0.8887	0.901061	14.477	6.93	-0.51	6.93	5.87	512		M-P-A-Am
36	0.031	111.146	0.018	0.146	46.428	0.05	9.966	0.3395	0.347331	14.816	-0.18	-0.18	7.86	5.57	552		M-P-A-Am
37	0.266	154.486	0.01	0.141	1.049	0.05	116.385	1.0385	1.0521	3.54	167.55	105	62.55	7.2	1738		S+P-A+Am
38	0.244	58.555	0.01	0.135	0.786	0.05	224.563	0.3718	0.379898	1.582	106.74	73.7	33.05	7.31	1500		S+P-A+Am
39	0.217	141.641	0.01	0.126	10.484	0.05	459.016	0.6776	0.68822	4.645	59.69	36.68	23.01	7.15	221		S+P-A+Am
40	0.02	149.297	0.015	0.01	10	0.05	42.493	2.6951	2.72236	7.275	9.74	1.45	8.29	6.4	804		M+P-A+Am
41	0.02	141.372	0.016	0.085	12.401	0.05	30.079	3.1069	3.13756	10.693	9.39	0.77	8.61	5.91	693		M+P-A+Am
42	0.047	149.171	0.015	0.093	5.455	0.05	37.614	2.9479	2.97724	6.519	11.28	2.62	8.66	5.74	742		M+P-A+Am
43	0.206	118.509	0.01	0.082	1.308	0.05	299.063	1.9945	2.01598	5.61	44.62	21.95	21.95	6.91	1421		S-P-A+Am
44	0.02	0.1	0.01	0.25	183.003	0.05	0.346	1.9515	1.97263	5.149	38.47	19.67	18.8	6.86	1403		S-P-A+Am
45	0.171	113.896	0.01	0.142	0.772	0.05	278.255	1.5148	1.53232	3.78	40.61	21.15	19.46	6.97	1310		S-P-A+Am
46	0.02	115.937	0.01	0.112	47.888	0.05	7.087	3.7355	3.77134	20.498	9.2	-0.83	9.2	5.45	586		M-P-A+Am
47	0.033	113.017	0.01	0.091	46.966	0.05	10.264	2.6945	2.72175	23.819	8.4	-0.97	8.4	5.23	571		M-P-A+Am
48	0.032	112.384	0.01	0.082	51.214	0.05	9.948	3.1003	3.1309	23.38	8.74	-0.87	8.74	5.16	575		M-P-A+Am
49	0.13	101.711	0.01	0.02	27.118	3.144	41.878	1.0268	1.0403	47.394	24.21	8.54	15.67	7.35	676
50	0.056	77.984	0.032	0.02	26.974	4.11	42.186	1.792	1.81181	35.242	25.66	9.14	16.51	7.41	558
51	0.102	100.521	0.067	0.066	27.423	2.965	42.855	0.665	33.7758	48.024	33.29	-0.51	33.29	7.42	733
52	0.143	77.101	0.156	0.039	27.659	2.792	43.144	0.4216	21.5054	35.391	33	-0.59	33	7.45	574
53
54

## Sheet: Batch 2
Batch II
Listopadu 26	Fluoride	Chloride	Nitrite	Bromide	Nitrate	Phosphate	Sulfate	Ammonium dilution 50x (abs)	Conc	TN	TC	IC	TOC	pH	Conductivity
1	0.037	15.344	0.01	0.02	0.005	0.05	23.064	0.2365	0.243482	1.40853	28.1191	10.5732	17.5459	6.97	1526
2	0.051	11.765	0.01	0.02	0.103	0.05	16.696	0.1496	0.155865	1.36756	54.5863	27.7016	26.8847	6.75	1562
3	0.043	16.216	0.01	0.02	0.009	0.05	19.359	0.1857	0.192263	1.04481	31.8298	11.664	20.1658	6.74	1104
4	0.02	59.804	0.014	0.081	12.771	0.415	52.737	2.7098	2.73718	7.33129	10.2874	-1.87199	10.2874	5.53	756
5	0.038	109.831	0.01	0.067	4.113	0.05	33.671	0.7136	0.724517	1.96056	6.99268	-2.19526	6.99268	5.66	480
6	0.02	0.1	0.01	0.02	11.121	0.05	0.1	2.8996	2.92855	6.3827	8.38456	-2.1363	8.38456	5.85	641
7	0.082	13.717	0.01	0.02	0.214	0.05	30.476	0.7234	0.734397	2.3629	22.2034	4.33751	22.2034	6.85	998
8	0.02	3.205	0.004	0.02	0.1	0.05	0.1	4.1552	4.1945	12.0509	16.126	-1.95262	16.126	6.6	849
9	0.048	15.355	0.033	0.02	2.073	0.05	25.543	3.2587	3.29061	12.1976	23.5199	0.719165	23.5199	6.6	1108
10	0.032	116.555	0.01	0.103	40.248	0.05	23.159	0.054	2.97383	13.1742	6.39859	-3.5411	6.39859	5.66	541
11	0.033	11.602	0.01	0.09	39.949	0.05	13.156	0.0298	1.75385	8.09489	2.31658	-3.95567	2.31658	5.59	492
12	0.02	117.512	0.01	0.115	55.008	0.05	17.397	0.0422	2.37896	12.1838	2.70721	-3.93393	2.70721	5.52	549
13	0.229	147.309	0.01	0.075	2.032	0.05	323.383	1.063	1.0768	2.4005	64.0198	43.4173	20.6025	6.63	1502
14	0.02	2.502	0.074	267.388	0.1	3.125	0.1	0.252	0.25911	1.4136	79.5908	48.9841	30.6067	6.71	983
15	0.209	157.453	0.557	0.053	9.255	0.05	102.472	3.6454	3.6805	7.96992	25.6577	7.3915	18.2662	7.05	846
16	0.02	146.26	0.015	0.077	7.412	0.05	44.055	3.1747	3.20591	6.46903	8.04097	-2.04026	8.04097	5.54	682
17	0.035	155.178	0.01	0.079	3.115	0.05	37.414	0.9481	0.960951	1.97694	4.25219	-3.24841	4.25219	5.75	802
18	0.034	164.975	0.01	0.081	1.515	0.05	37.4	0.3964	0.4047	0.955285	3.85247	-3.56094	3.85247	5.85	735
19	0.236	188.038	0.37	0.071	33.87	0.05	97.472	0.2723	13.9788	25.2267	20.6114	-1.65141	20.6114	6.5	987
20	0.255	136.68	0.233	0.067	29.248	0.05	138.853	0.2553	13.1218	24.5795	18.5683	0.541722	18.0266	6.61	967
21	0.037	130.922	0.016	0.126	70.751	0.05	18.309	0.248	12.7538	24.1119	19.8262	-1.1847	19.8262	6.48	1008
22	0.02	137.808	0.015	0.103	58.242	0.05	12.081	0.2134	11.0096	29.5069	9.29055	-3.71264	9.29055	5.19	691
23	0.038	150.328	0.019	0.131	62.668	0.05	11.327	0.2268	11.6851	27.6994	9.46469	-3.90517	9.46469	5.51	612
24	0.15	54.783	0.015	0.02	57.66	0.05	63.634	0.2227	11.4784	28.3088	10.5048	-3.78558	10.5048	5.31	593
25	0.141	54.29	0.018	0.068	54.871	0.05	83.839	0.4214	0.429907	1.60465	126.104	73.6967	52.4076	6.63	154
26	0.196	123.058	0.01	0.058	0.546	0.546	254.543	0.1945	0.201135	1.31202	67.6909	42.4157	25.2751	6.71	1468
27	0.298	118.351	0.01	0.069	2.098	0.495	86.102	0.191	0.197606	1.04709	91.1557	52.136	39.0197	6.82	1345
28	0.02	111.777	0.058	0.071	17.291	0.411	63.995	0.1854	9.59801	12.1796	10.9631	-0.418312	10.9631	5.85	662
29	0.02	140.874	0.042	0.093	7.431	0.441	62.341	0.023	1.41104	4.09864	11.2985	1.15222	10.1463	5.74	702
30	0.02	123.609	0.057	0.095	71.206	0.454	71.206	0.1126	5.92799	14.1155	12.0207	-0.128324	12.0207	5.75	710
31	0.218	81.756	0.01	0.087	2.451	0.512	331.082	0.7319	0.742967	2.81607	40.4863	8.90592	31.5803	6.61	1273
32	0.194	99.356	0.01	0.079	1.662	0.05	361.419	1.8513	1.8716	3.49795	35.6579	17.2175	18.4405	6.71	1597
33	0.231	96.461	0.01	0.071	1.449	0.477	303.174	2.5275	2.55338	4.45854	35.9207	15.7661	20.1546	6.77	1564
34	0.04	103.857	0.116	0.09	55.97	0.381	26.546	2.698	2.72528	18.1143	11.8735	-0.757209	11.8735	5.57	513
35	0.02	104.974	0.037	0.096	41.617	0.396	22.315	1.2369	1.25213	11.9248	8.12398	-3.27805	8.12398	5.53	479
36	0.02	108.142	0.018	0.115	40.824	0.371	16.248	1.4325	1.44935	12.0435	8.22539	-3.88168	8.22539	5.85	562
37	0.247	143.763	0.01	0.068	1.708	0.381	28.027	3.0392	3.0693	7.00347	124.89	71.873	53.0171	6.76	1678
38	0.256	144.528	0.01	0.112	2.768	0.361	86.176	1.8785	1.89902	3.93096	95.1322	64.6479	30.4843	6.78	1382
39	0.233	150.427	0.01	0.099	0.42	0.05	271.253	1.3634	1.37968	2.74512	60.9674	34.8334	26.1341	6.63	212
40	0.092	154.595	0.015	0.095	16.38	0.416	6.888	0.0913	4.85421	11.4317	10.043	-2.02681	10.043	5.63	768
41	0.02	138.632	0.016	0.071	17.968	0.05	37.447	0.151	7.86383	16.5272	10.3559	-2.14604	10.3559	5.52	573
42	0.02	146.903	0.015	0.086	15.038	0.05	41.54	0.1347	7.0421	13.8068	10.477	-1.49396	10.477	5.49	741
43	0.184	117.174	0.01	0.064	0.7	0.366	220.679	0.1208	6.34137	8.63662	48.9866	24.7642	24.2224	6.73	1400
44	0.203	109.479	0.01	0.069	1.777	0.05	263.665	2.6239	2.65057	5.33801	41.5789	21.6283	19.9507	6.65	1385
45	0.24	127.07	0.01	0.079	1.069	0.05	0.1	2.5909	2.6173	3.63665	42.3458	12.1957	30.1501	6.76	1208
46	0.049	123.604	0.01	0.113	50.495	0.05	11.785	0.1428	7.45044	22.448	10.2431	-3.08568	10.2431	5.67	576
47	0.02	114.163	0.01	0.082	44.398	0.05	11.015	0.1502	7.8235	22.1122	8.68895	-3.57903	8.68895	5.77	561
48	0.02	118.41	0.01	0.087	43.512	0.407	10.049	0.1609	8.36291	21.9176	9.55322	-3.83256	9.55322	5.31	520
49	0.109	100.883	0.003	0.038	28.345	0.05	43.613	0.6006	0.610585	41.7653	25.8099	8.96039	16.8495	7.43	628
50	0.146	77.897	0.061	0.041	28.418	0.05	43.035	0.3764	0.384536	30.8141	25.9247	8.74359	17.1811	7.31	521
51	0.11	35.509	0.067	0.02	24.915	2.965	39.558	0.6088	30.9426	40.0373	25.9703	7.85684	18.1134	7.24	699
52	0.112	73.799	0.156	0.02	25.141	2.792	40.086	0.4187	21.3592	29.3388	26.8856	8.5885	18.2971	6.52	513
53
54

## Sheet: Batch 3
Batch III
Listopadu 26	Fluoride	Chloride	Nitrite	Bromide	Nitrate	Phosphate	Sulfate	Ammonium dilution 50x (abs)	Conc	TN	TC	IC	TOC	pH	Conductivity
1	0.075	14.726	0.01	0.02	0.1	0.05	20.637	0.3883	0.396534	1.19289	29.8679	14.334	15.5339	7.2	1305
2	0.046	11.98	0.031	0.02	0.1	0.05	15.772	0.3661	0.374151	1.56251	48.4274	26.1476	22.2797	7.32	1289
3	0.046	14.852	0.029	0.02	0.227	0.05	15.626	0.9887	1.00189	3.27165	27.7191	8.23179	19.4873	7.48	968
4	0.02	142.707	0.01	0.091	10.894	0.05	50.492	0.1043	5.50957	7.1285	9.28953	-1.54424	9.28953	6.23	701
5	0.04	119.834	0.01	0.08	3.924	0.05	36.071	1.0457	1.05936	2.26062	6.06669	-2.81122	6.06669	6.15	421
6	0.038	139.576	0.01	0.086	18.14	0.05	55.003	0.1106	5.82717	10.6359	8.18446	-2.70069	8.18446	5.41	524
7	0.047	14.357	0.01	0.02	0.462	0.05	28.66	0.5352	0.544645	2.30024	27.2762	1.67812	25.5981	7.12	872
8	0.063	10.45	0.026	0.02	2.434	0.05	13.893	0.1811	9.38124	16.9709	17.7988	-0.476959	17.7988	7.11	792
9	0.046	13.398	0.077	0.02	2.036	0.05	17.514	0.1653	8.58472	15.9663	25.9844	3.74218	22.2422	6.86	968
10	0.034	120.976	0.01	0.114	54.686	0.05	29.633	0.1181	6.20526	18.9483	9.28051	-3.41919	9.28051	5.7	431
11	0.088	97.402	0.042	0.151	42.723	0.05	12.314	0.0852	4.54669	13.2831	5.78151	-3.74612	5.78151	5.16	461
12	0.036	126.84	0.01	0.121	58.269	0.05	22.419	0.3463	17.7094	21.5255	7.4116	-3.91277	7.4116	5.43	521
13	0.036	19.328	0.01	0.02	0.354	0.05	36.677	1.3125	1.32836	2.50518	54.5843	34.4279	20.1564	6.9	1308
14	0.055	18.888	0.01	0.02	0.082	0.05	5.142	1.0253	1.03879	1.95026	63.1866	39.3924	23.7942	6.96	854
15	0.047	17.766	0.01	0.02	1.008	0.05	8.201	0.1789	9.27033	14.4523	25.4288	8.29522	17.1335	7.12	764
16	0.02	74.228	0.038	0.072	0.038	0.05	47.714	0.1436	7.49077	8.66134	7.69434	-1.96699	7.69434	5.85	582
17	0.02	159.131	0.01	0.076	6.161	0.05	39.525	2.9948	3.02453	5.5504	5.00184	-3.24322	5.00184	5.45	702
18	0.038	168.832	0.01	0.073	3.607	0.05	42.128	2.3534	2.37784	3.94843	4.49352	-3.28867	4.49352	6.13	635
19	0.054	18.511	0.092	0.02	2.993	0.05	13.951	0.4332	22.0902	30.2035	20.2583	-1.48477	20.2583	7.18	888
20	0.048	14.26	0.046	0.02	2.202	0.05	10.634	0.4211	21.4802	30.1173	20.7325	3.31264	17.4199	7.26	925
21	0.047	16.121	0.274	0.02	1.777	0.05	13.279	0.3468	17.7346	27.5782	25.7928	4.4286	21.3642	7.11	869
22	0.034	143.75	0.01	0.096	68.193	0.05	20.723	0.3495	17.8707	34.0755	10.2311	-3.57095	10.2311	5.26	661
23	0.033	141.448	0.01	0.097	53.99	0.05	19.774	0.4137	21.1072	32.4027	10.4892	-3.71067	10.4892	5.41	561
24	0.033	152.571	0.01	0.11	54.905	0.05	14.3	0.3485	17.8203	29.3241	10.641	-2.92839	10.641	5.37	542
25	0.044	15.722	0.015	0.02	0.044	0.05	54.991	0.3032	0.310732	1.46435	62.6722	39.4248	23.2474	7.08	181
26	0.05	16.326	0.01	0.02	0.053	0.05	3.18	0.388	0.396231	1.42393	141.694	88.9416	52.752	7.43	1285
27	0.045	13.684	0.022	0.02	0.1	0.05	16.996	0.501	0.510163	1.12092	102.017	74.6843	27.333	7.25	1058
28	0.02	114.576	0.033	0.079	14.299	0.05	59.07	0.1282	6.71442	9.49307	12.3019	0.847172	11.4547	6.12	562
29	0.02	136.108	0.076	0.078	11.996	0.05	58.39	0.086	4.58702	7.80403	12.1504	-0.713771	12.1504	6.23	685
30	0.02	134.123	0.019	0.079	21.648	0.05	65.936	0.1314	6.87574	12.6714	11.8806	0.17841	11.8806	6.14	690
31	0.046	8.381	0.01	0.02	0.1	0.05	42.048	1.3811	1.39752	2.28432	36.5414	20.5673	15.9741	7.26	1068
32	0.042	9.566	0.01	0.02	0.1	0.05	46.716	2.4492	2.47443	4.08151	36.0192	17.2821	18.7371	7.08	1091
33	0.043	8.8	0.01	0.02	0.1	0.05	44.5	0.0617	3.362	3.89398	34.8283	18.9037	15.9246	7.46	1132
34	0.02	109.876	0.02	0.091	44.689	0.05	22.63	0.073	3.93166	16.1226	8.94724	-2.91165	8.94724	6.74	510
35	0.033	114.883	0.019	0.101	46.884	0.05	21.462	1.7983	1.81816	13.996	8.1135	-3.4391	8.1135	5.32	410
36	0.02	114.646	0.01	0.115	6.552	0.05	14.312	1.1024	1.11652	12.5579	7.88999	-3.66203	7.88999	5.87	523
37	0.007	21.421	0.01	0.02	0.1	0.05	4.921	0.0671	3.63423	2.72522	104.762	67.2315	37.53	7.12	1286
38	0.042	21.581	0.01	0.02	0.1	0.05	27.398	0.6858	0.696487	1.15139	56.0116	37.1067	18.9049	7.02	1085
39	0.052	20.349	0.01	0.02	0.1	0.05	43.562	1.24	1.25526	2.21027	57.8493	33.388	24.4614	7.09	197
40	0.05	152.665	0.026	0.081	17.249	0.05	39.971	0.1324	6.92616	15.6605	12.9602	-1.38859	12.9602	5.78	717
41	0.02	137.442	0.058	0.056	18.257	0.05	38.971	0.2651	13.6159	18.1218	10.6669	-1.63852	10.6669	5.89	673
42	0.02	148.541	0.066	0.065	8.368	0.05	55.542	0.1616	8.3982	14.203	9.99	-0.304602	9.99	5.69	751
43	0.047	12.63	0.01	0.02	0.1	0.05	22.384	2.6101	2.63666	9.89207	46.6319	24.1807	22.4512	6.8	1520
44	0.049	12.892	0.01	0.02	0.1	0.05	31.505	2.585	2.61135	7.56717	43.4844	24.0415	19.4429	6.78	1089
45	0.009	13.729	0.01	0.02	0.1	0.05	24.281	2.4918	2.51738	6.99644	46.7669	24.3587	22.4081	6.97	984
46	0.033	132.219	0.01	0.093	49.553	0.05	20.224	2.7577	2.78548	24.979	10.9411	-2.94518	10.9411	5.38	479
47	0.02	125.801	0.01	0.096	46.279	0.05	17.088	2.3212	2.34538	26.8134	9.55235	-3.573	9.55235	5.47	512
48	0.02	126.619	0.01	0.078	45.349	0.05	11.488	2.771	2.79888	23.1097	9.53885	-3.57555	9.53885	5.29	502
49	0.135	95.571	0.151	0.02	24.717	0.509	39.493	1.0561	1.06984	39.441	23.9035	8.1562	15.7473	5.14	617
50	0.125	73.934	0.225	0.02	25.168	3.17	39.641	1.626	1.64444	29.6204	25.2489	8.66183	16.587	6.23	501
51										40.0373
52										29.3388
53
54

## Sheet: Batch 4
Batch IV	Fort-nightly metal							not recommended
Listopadu 12	Fluoride	Chloride	Nitrite	Bromide	Nitrate	Phosphate	Sulfate	Ammonium without dilution (abs)		TN	TC	IC	TOC	pH	Conductivity
1	0.191	102.839	0.01	0.02	1.727	0.05	103.779	0.894	0.906404	2.78598	25.8709	8.50919	17.3617	7.111	630
2	0.253	90.987	0.135	0.02	2.342	0.05	98.024	0.9677	0.980712	2.68243	22.162	6.40029	15.7617	7.132	655
3	0.196	124.686	0.032	0.02	2.491	0.05	124.396	1.3627	1.37897	3.34438	38.6234	18.7018	19.9216	7.2	675
4	0.036	107.005	0.01	0.068	10.849	0.05	50.845	2.8714	2.90011	7.62136	7.99577	-2.47625	7.99577	6.142	526
5	0.036	108.094	0.01	0.056	11.825	0.05	39.583	2.7014	2.72871	7.10789	7.25315	-3.39474	7.25315	6.387	517
6	0.035	134.827	0.068	0.02	7.401	0.05	41.716	2.2308	2.25423	5.57119	6.40391	-3.54548	6.40391	5.974	649
7	0.065	43.829	0.01	0.02	0.176	0.05	43.105	1.2526	1.26796	3.22794	31.7767	8.32529	23.4514	7.124	621
8	0.216	101.445	0.841	0.049	22.343	0.05	128.219	2.8648	2.89346	17.6243	23.6628	5.40408	18.2587	7.141	695
9	0.214	119.383	0.343	0.075	18.593	0.05	139.269	3.6176	3.65247	14.4442	27.568	5.34557	22.2224	7.23	698
10	0.02	105.516	0.01	0.071	34.119	0.05	28.672	2.9695	2.99902	14.5807	7.47739	-3.37695	7.47739	5.621	515
11	0.033	95.227	0.02	0.083	36.628	0.05	25.37	3.7113	3.74694	15.2243	5.96634	-3.53838	5.96634	5.641	411
12	0.02	109.589	0.01	0.08	43.996	0.05	29.803	2.9087	2.93772	21.2198	6.93217	-3.50214	6.93217	5.741	538
13	0.191	117.444	0.014	0.02	2.778	0.05	111.132	2.6214	2.64805	5.38279	29.524	11.0813	18.4426	6.851	410
14	0.234	83.754	1.052	0.02	1.125	0.05	78.275	3.4475	3.48096	10.9652	15.3256	2.18285	13.1428	6.842	549
15	0.188	105.096	0.094	0.02	1.812	0.05	61.8	3.0877	3.1182	10.4286	27.2102	12.3714	14.8388	7.174	521
16	0.039	137.086	0.024	0.063	15.269	0.05	46.326	3.7724	3.80854	16.9584	10.1784	-0.756179	10.1784	5.622	570
17	0.035	142.856	0.01	0.058	8.729	0.05	45.477	3.8754	3.91239	8.94837	7.95801	-1.36167	7.95801	5.463	621
18	0.038	139.022	0.025	0.051	9.693	0.05	47.201	3.8245	3.86107	11.1464	7.15877	-2.10172	7.15877	5.686	635
19	0.237	138.106	0.122	0.051	25.513	0.05	92.792	2.8829	2.91171	31.1477	25.5044	5.70141	19.803	7.221	829
20	0.242	122.98	0.156	0.044	24.311	0.05	77.826	1.6822	1.70111	33.4297	24.5319	6.9869	17.545	7.084	705
21	0.292	123.554	0.677	0.046	22.572	0.05	77.829	1.6318	1.65029	31.5202	21.8191	2.60899	19.2102	7.134	701
22	0.02	132.64	0.01	0.067	44.445	0.05	21.187	2.443	2.46818	26.8963	8.12902	-3.14905	8.12902	6.132	751
23	0.02	134.296	0.01	0.07	50.349	0.05	19.101	2.212	2.23527	32.4196	8.5649	-3.50352	8.5649	5.567	698
24	0.02	138.027	0.01	0.079	52.141	0.05	22.115	2.5611	2.58725	31.1654	7.82997	-3.54697	7.82997	5.464	570
25	0.141	136.261	0.01	0.02	1.936	0.05	260.423	1.637	1.65553	3.33875	38.1575	19.9517	18.2058	7.245	1450
26	0.235	132.892	0.01	0.016	0.142	0.05	37.429	0.6756	0.686203	2.44708	109.031	66.9154	42.116	7.172	1217
27	0.158	111.657	0.01	0.02	0.226	0.05	46.629	1.729	1.74829	3.16775	81.6824	55.2577	26.4247	6.961	1282
28		0.1	0.01	0.058	8.488	0.05	54.208	3.379	3.4119	7.70975	10.7293	0.89729	9.83197	6.123	548
29	0.045	121.65	0.01	0.067	10.886	0.05	56.737	3.8736	3.91058	8.98381	11.1637	-0.474059	11.1637	6.253	626
30	0.043	110.644	0.01	0.056	19.493	0.05	62.928	2.8352	2.86361	15.9297	11.2468	-0.276298	11.2468	6.396	619
31	0.212	91.143	0.01	0.02	0.251	0.05	147.42	3.0068	3.03663	4.99827	33.7186	16.5664	17.1522	6.969	1061
32	0.187	107.458	0.01	0.02	0.575	0.05	168.598	2.7928	2.82086	5.1762	35.5723	16.3313	19.2409	7.191	1119
33	0.185	102.473	0.01	0.02	0.055	0.05	131.649	3.4424	3.47582	5.73135	35.7771	17.4715	18.3057	7.317	1250
34	0.02	95.87	0.018	0.066	36.807	0.05	28.062	10	10.0875	16.3818	7.81104	-3.13845	7.81104	5.725	377
35	0.037	104.714	0.01	0.095	41.156	0.05	32.466	3.2365	3.26822	15.992	8.47638	-3.31672	8.47638	6.524	600
36	0.034	102.16	0.01	0.075	35.341	0.05	37.103	3.5851	3.6197	17.489	9.48152	-3.04468	9.48152	6.872	352
37	0.02	160.084	0.01	0.02	1.186	0.05	15.605	2.7342	2.76178	5.60032	122.285	71.3082	50.9765	7.044	1322
38	0.144	150.425	0.01	0.02	0.121	0.05	66.564	2.7095	2.73688	5.5829	60.1386	37.086	23.0525	7.521	1502
39	0.138	157.601	0.01	0.027	0.898	0.05	121.535	1.3089	1.32473	2.93377	62.1462	38.6039	23.5423	7.023	1532
40	0.02	130.073	0.01	0.059	17.527	0.05	48.66	2.4762	2.50165	19.871	12.8265	-1.34877	12.8265	5.83	521
41	0.02	131.123	0.01	0.053	14.15	0.05	40.337	2.5689	2.59512	17.0282	9.62199	-1.81969	9.62199	6.541	688
42	0.043	120.312	0.01	0.041	14.065	0.05	51.975	2.5254	2.55126	23.8886	11.8884	-0.649114	11.8884	5.841	352
43	0.211	120.67	0.01	0.02	0.67	0.05	99.761	3.2078	3.23929	14.333	43.316	18.9671	24.3489	7.032	961
44	0.212	123.105	0.01	0.02	4.354	0.05	125.711	3.4311	3.46443	10.2793	40.3707	18.9952	21.3756	7.658	1356
45	0.21	130.424	0.01	0.02	1.206	0.05	116.872	3.7709	3.80703	9.67114	40.7019	18.6834	22.0186	7.215	824
46	0.02	119.314	0.01	0.075	39.98	0.05	14.353	2.9583	2.98773	23.8223	9.94839	-3.40008	9.94839	6.458	544
47	0.02	112.701	0.01	0.061	34.681	0.05	24.78	2.0172	2.03887	29.7351	9.96075	-3.29242	9.96075	6.45	586
48	0.036	113.669	0.01	0.055	33.661	0.05	26.49	2.2332	2.25665	30.048	9.59222	-3.43469	9.59222	6.321	452
49	0.108	97.083	0.031	0.02	24.108	2.937	29.858	0.9627	0.975671	41.2397	28.2095	7.61352	20.596	6.216	689
50	0.113	75.178	0.219	0.02	26.978	3.144	32.137	1.6698	1.6886	31.3991	29.3091	7.73366	21.5755	7.423	587
51	0.107	96.668	2.077	0.02	19.424	2.446	29.164	1.6	1.61823	41.8741	25.4295	7.25384	18.1756	7.651	689
52	0.108	74.888	4.73	0.02	17.798	2.484	30.106	1.2086	1.2236	30.929	25.6413	7.09705	18.5443	7.342	598
53								1.5507	1.56852
54								1.4745	1.49169

## Sheet: Batch 5
Batch V
Listopadu 19	Fluoride	Chloride	Nitrite	Bromide	Nitrate	Phosphate	Sulfate	Ammonium dilution 50x (abs)	Conc	TN	TC	IC	TOC	pH	Conductivity	DO	redox
1	0.161	96.535	0.04	0.02	0.757	0.429	81.481	0.0412	2.32855	2.62133	25.4925	12.6355	12.8571	7.023	634	10.74	421
2	0.189	92.589	0.248	0.061	1.709	0.409	95.774	0.095	5.04073	5.55341	25.9601	10.5621	15.398	7.196	636	11.05	492
3	0.139	116.852	0.01	0.02	0.759	0.05	103.258	0.06	3.2763	4.18015	38.4578	22.6317	15.8261	6.795	814	11.06	619
4	0.037	100.475	0.042	0.02	14.153	0.437	54.458	0.1348	7.04715	11.7134	11.4406	0.542785	10.8978	5.657	515	10.96	732
5	0.02	103.006	0.01	0.054	11.402	0.424	46.327	0.0766	4.11315	8.28564	11.0989	0.175835	10.9231	5.529	521	11.07	743
6	0.041	109.314	0.048	0.048	17.291	0.448	49.17	0.1446	7.54119	13.7329	13.1312	2.17837	10.9528	6.02	567	11	820
7	0.234	107.964	0.015	0.02	0.716	0.356	150.308	0.0393	2.23276	3.39421	39.287	13.3288	25.9582	6.959	854	11.02	489
8	0.241	90.218	0.813	0.02	9.325	0.456	89.702	0.232	11.9472	20.2977	29.715	12.316	17.399	7.043	698	11.07	432
9	0.261	92.909	0.576	0.02	7.843	0.451	90.787	0.2293	11.8111	20.4028	30.0747	11.5358	18.5389	7.292	693	11.08	565
10	95.643	0.029	0.01	0.05	31.256	0.05	35.211	0.1519	7.9092	17.6206	9.31605	-1.22958	9.31605	5.717	503	11.07	731
11	0.02	94.628	0.023	0.054	31.544	0.41	36.316	0.1603	8.33266	17.8657	8.53284	-1.61386	8.53284	5.658	488	11.02	720
12	0.046	105.905	0.01	0.066	42.911	0.424	28.494	0.16	8.31754	21.4754	8.04757	-1.92025	8.04757	5.42	538	11.07	765
13	0.189	109.148	0.01	0.02	1.826	0.369	90.611	0.0609	3.32167	4.95755	34.3425	18.3317	16.0108	6.791	331	10.94	780
14	0.196	88.491	0.01	0.02	0.909	0.426	54.225	0.1696	8.8015	12.2081	36.6147	19.4149	17.1998	6.798	602	10.52	610
15	0.161	105.202	0.01	0.02	0.982	0.436	56.133	0.1989	10.2786	13.0562	39.5653	23.6578	15.9076	6.899	707	10.91	587
16	0.02	134.066	0.01	0.056	8.216	0.445	35.228	0.1331	6.96144	12.6906	10.2368	0.973749	9.26304	5.565	660	10.94	752
17	0.02	137.657	0.01	0.055	9.29	0.464	48.048	0.1215	6.37666	10.3368	9.91884	0.127036	9.7918	5.351	687	11.08	854
18	0.02	132.468	0.01	0.02	7.388	0.449	50.305	0.1239	6.49765	10.1841	12.0402	2.58136	9.4588	5.63	680	11.08	821
19	0.244	123.433	0.01	0.02	20.143	0.535	72.162	0.4211	21.4802	34.0573	29.917	12.3748	17.5422	7.114	821	11.05	567
20	0.259	122.529	0.01	0.02	23.289	0.624	77.528	0.5122	26.0728	39.3791	27.5031	10.6451	16.8579	6.921	833	10.99	476
21	0.26	118.959	0.01	0.02	25.804	0.543	75.604	0.4733	24.1117	37.7096	27.4767	8.93	18.5467	6.932	792	11.08	468
22	0.02	0.1	0.01	0.02	0.02	0.05	0.1	0.3582	18.3093	35.2476	11.4327	-0.995121	11.4327	5.305	612	11.06	736
23	0.049	127.677	0.01	0.061	39.194	0.505	24.571	0.3633	18.5664	34.5247	10.4235	-1.1967	10.4235	5.533	675	11.06	865
24	0.037	129.393	0.01	0.052	38.165	0.49	28.505	0.3483	17.8102	31.2977	10.8174	-0.860166	10.8174	5.541	679	11.07	852
25	0.148	123.196	0.01	0.02	5.715	0.435	204.132	0.0727	3.91654	6.61143	42.1033	22.6051	19.4981	7.037	665	9.1	512
26	0.24	126.794	0.01	0.02	0.203	0.419	17.93	0.0231	1.41608	1.79332	126.053	75.2567	50.7966	7.13	1084	8.98	612
27	0.16	111.789	0.01	0.02	0.597	0.405	92.923	0.0133	0.922042	1.35235	91.3088	64.06	27.2488	7.15	1082	9.65	543
28	0.02	93.8	0.042	0.02	7.073	0.445	56.582	0.1054	5.56502	11.2059	14.4612	4.0402	10.421	5.816	528	10.23	721
29	0.02	124.062	0.01	0.057	7.768	0.49	56.082	0.0563	3.08977	6.20309	12.5351	2.45296	10.0822	5.627	636	10.59	892
30	0.02	107.937	0.01	0.045	10.983	0.486	66.112	0.1658	8.60993	15.4096	14.5627	3.78547	10.7772	5.885	603	9.93	795
31	0.207	96.451	0.01	0.02	1.206	0.423	200.421	0.0823	4.4005	5.80212	40.171	22.6706	17.5004	7.05	1025	10.55	432
32	0.193	102.63	0.01	0.052	0.147	0.05	230.314	0.0891	4.7433	7.98413	44.556	21.9882	22.5678	7.25	1095	11.11	548
33	0.194	99.85	0.01	0.02	1.235	0.05	225.3	0.1054	5.56502	7.92634	43.6381	22.4762	21.162	7.095	1083	10.59	559
34	0.02	100.803	0.029	0.062	29.365	0.345	36.02	0.1558	8.10581	18.2419	10.7031	0.26731	10.4358	5.559	297	10.67	854
35	0.02	103.187	0.01	0.111	37.723	0.05	32.33	0.1203	6.31617	18.0533	10.4524	-0.733352	10.4524	5.61	543	10.31	783
36	0.02	109.517	0.01	0.075	37.856	0.05	28.431	0.0823	4.4005	15.7698	9.66513	-0.936955	9.66513	5.4	250	10.28	788
37	0.197	151.419	0.01	0.02	1.096	0.05	11.004	0.0838	4.47611	4.79626	118.117	62.1106	56.006	6.93	1152	9.82	566
38	0.17	149.361	0.032	0.117	0.76	0.05	143.934	0.0627	3.41241	4.54465	63.6283	41.6104	22.0179	6.88	1191	10.61	498
39	0.151	147.169	0.01	0.02	0.2	0.386	216.463	0.0634	3.4477	4.74574	54.686	32.7713	21.9147	6.959	1340	10.2	611
40	149.771	0.1	0.01	0.02	4.402	0.418	38.671	0.1132	5.95824	11.1714	13.0057	2.09156	10.9141	5.403	707	10.8	910
41	0.02	126.765	0.01	0.05	12.246	0.05	40.383	0.2037	10.5206	16.8999	11.4153	0.834786	10.5805	6.39	644	10.1	899
42	0.02	126.319	0.05	0.02	11.143	0.49	38.142	0.2338	12.038	17.7942	11.0282	1.44357	9.58458	5.657	218	10.35	919
43	0.2	115.873	0.032	0.02	0.615	0.05	126.611	0.2819	14.4628	18.2958	41.1729	20.44	20.7329	7.105	684	10.66	459
44	0.217	123.435	0.01	0.02	0.532	0.05	165.308	0.1655	8.59481	10.9525	42.637	22.273	20.3639	7.11	1024	10.58	619
45	0.206	128.746	0.01	0.02	0.4	0.05	146.522	0.2026	10.4651	11.4278	41.0052	20.6649	20.3403	7.05	758	10.46	567
46	0.02	0.1	0.01	0.091	41.154	0.05	12.036	0.2038	10.5256	25.3086	10.467	-1.23362	10.467	5.49	182.2	10.85	887
47	0.02	116.133	0.01	0.035	36.454	0.05	16.499	0.2931	15.0274	29.5808	9.16559	-1.80638	9.16559	5.57	565	10.86	892
48	0.05	114.568	0.01	0.052	26.599	0.05	34.844	0.2948	15.1131	31.0022	9.08259	-2.34219	9.08259	5.87	308	10.92	798
49	0.11	97.286	0.01	0.02	29.621	2.098	38.282	0.6153	31.2703	45.7747	27.3715	10.2545	17.1171	7.36	639	9.56	353
50	0.11	74.299	0.028	0.02	25.129	2.555	39.498	0.41	20.9206	32.6876	25.6555	9.71561	15.9398	7.26	531	9.58	362
51	0.107	95.721	0.078	0.02	24.13	2.078	31.638	0.623	31.6585	44.6984	33.9154	11.3581	22.5574	7.44	638	9.02	559
52	0.111	74.34	0.06	0.02	24.551	2.022	38.356	0.4307	21.9642	33.3154	35.2575	12.0943	23.1632	7.25	531	9.27	562
53
54

## Sheet: Batch 6
Batch VI
Listopadu 26	Fluoride	Chloride	Nitrite	Bromide	Nitrate	Phosphate	Sulfate	Ammonium dilution 50x (abs)	Conc	TN	TC	IC	TOC	pH	Conductivity
1	0.191	99.622	0.078	0.02	3.162	0.05	84.119	0.0456	2.55036	5.30923	24.7437	11.9516	12.7921	7.18	642
2	0.156	90.872	0.196	0.02	6.916	0.363	84.12	0.051	2.82259	6.8318	31.4056	12.1696	19.236	7.41	636
3	0.186	101.87	0.223	0.02	4.208	0.05	84.543	0.0201	1.26485	3.54734	20.4375	8.80228	11.6352	6.01	638
4	0.02	97.596	0.351	0.054	16.852	0.05	49.368	0.0927	4.92478	11.1937	9.83224	1.20376	8.62848	5.92	514
5	0.02	99.211	0.021	0.041	15.561	0.05	45.147	0.0806	4.3148	10.4772	9.21098	0.54229	8.66869	594	511
6	0.035	117.628	0.01	0.069	15.847	0.05	46.538	0.1012	5.35329	11.3781	8.10055	-0.338642	8.10055	5.78	585
7	0.222	102.915	0.01	0.02	0.616	0.05	136.97	0.0369	2.11177	3.95568	38.5292	15.1968	23.3324	6.94	787
8	0.22	87.103	0.734	0.02	19.791	0.05	75.253	0.2246	11.5742	21.3936	29.4713	13.2993	16.1719	7.22	642
9	0.24	90.775	0.208	0.02	17.134	0.05	68.917	0.1979	10.2282	18.5541	28.103	12.8786	15.2244	7.12	631
10	0.02	94.698	0.026	0.042	32.466	0.05	42.148	0.185	9.57785	21.1308	9.53815	-0.661249	9.53815	5.66	522
11	0.02	90.613	0.017	0.045	32.489	0.05	37.838	0.162	8.41836	19.4082	8.13671	-0.711597	8.13671	5.69	404
12	0.02	100.386	0.01	0.052	38.108	0.05	33.97	0.1691	8.77629	20.4873	8.0123	-0.707616	8.0123	5.71	523
13	0.187	109.549	0.046	0.656	0.1	0.357	81.713	0.0552	3.03432	4.21607	34.565	21.2528	13.3122	6.7	748
14	0.151	91.776	0.164	0.02	1.56	0.05	39.236	0.1356	7.08748	9.6074	39.913	25.6355	14.2775	6.83	627
15	0.02	0.1	0.01	0.036	9.176	0.05	49.844	0.3227	16.5196	23.1843	29.3986	15.6556	13.7429	7.48	590
16	0.02	120.729	0.034	0.065	21.203	0.05	49.758	0.2806	14.3973	23.6002	10.0946	0.887731	9.20689	5.8	642
17	0.02	0.1	0.01	0.02	0.1	0.05	49.833	0.1933	9.99627	16.52	8.29376	0.457713	7.83604	5.73	689
18	0.02	129.421	0.057	0.051	12.328	0.05	51.613	0.2002	10.3441	14.8999	9.08155	1.67686	7.40469	5.82	673
19	0.245	119.537	1.126	0.02	22.321	0.443	63.767	0.4569	23.285	34.8673	24.6574	9.7279	14.9295	6.98	772
20	0.238	118.209	0.677	0.02	19.262	0.451	73.638	0.4623	23.5572	34.056	29.3605	13.0982	16.2623	7.69	786
21	0.25	114.209	1.917	0.02	15.414	0.05	65.354	0.4294	21.8986	32.4257	29.4968	13.4542	16.0426	7.12	760
22	0.033	128.841	0.027	0.066	36.263	0.05	31.553	0.2957	15.1585	26.4034	10.5374	0.061619	10.4758	5.58	649
23	0.02	125.861	0.01	0.066	38.695	0.05	20.866	0.3885	19.8368	32.4801	9.21206	-1.00741	9.21206	5.29	619
24	0.02	127.728	0.01	0.077	43.484	0.05	21.796	0.3213	16.4491	30.3847	9.19289	-0.971423	9.19289	5.48	663
25	0.02	0.179	120.133	0.02	0.1	0.05	205.537	0.0345	1.99078	2.09211	38.0846	21.7475	16.3371	6.84	1071
26	0.217	121.603	0.01	0.02	0.832	0.05	25.341	0.0138	0.947248	1.19084	96.6879	70.0011	26.6869	7.2	1018
27	0.14	103.484	0.01	0.02	0.1	0.525	81.353	0.0066	0.584279	1.52354	70.142	51.1629	18.9792	7.17	391
28	0.02	95.89	0.01	0.047	11.692	0.05	55.283	0.0938	4.98024	9.53697	10.8897	2.98771	7.90195	5.76	131.4
29	0.02	111.633	0.069	0.069	12.13	0.05	53.8	0.0874	4.6576	8.75322	10.7607	1.75181	9.00888	6.16	361
30	0.02	111.304	0.088	0.051	16.651	0.05	62.919	0.1296	6.785	12.6981	10.9612	3.22258	7.73866	5.82	567
31	0.197	90.354	0.102	0.02	3.01	0.05	176.242	0.0826	4.41562	6.12603	36.3901	21.8043	14.5858	7.03	882
32	0.192	103.211	0.019	0.02	1.77	0.05	225.451	0.0965	5.11635	7.04865	37.9249	20.5694	17.3556	7.17	1037
33	0.192	98.75	0.037	0.02	1.606	0.05	0.1	0.1072	5.65576	7.38276	36.597	20.5741	16.0229	7.12	1019
34	0.02	93.203	0.044	0.07	32.344	0.05	42.77	0.1405	7.3345	17.4717	9.83381	0.283428	9.55038	6.09	500
35	0.02	96.925	0.018	0.051	35.098	0.05	36.458	0.1278	6.69426	17.2609	9.83237	-0.530347	9.83237	5.54	516
36	0.02	95.358	0.019	0.054	32.845	0.05	39.428	0.1428	7.45044	17.392	8.14171	-0.714548	8.14171	5.61	41.6
37	0.145	147.556	0.01	0.044	1.774	0.05	61.816	0.0899	4.78363	5.92592	60.1587	42.4954	17.6633	6.93	1012
38	0.139	147.03	0.01	0.085	0.723	0.05	0.1	0.0479	2.66631	3.47843	51.7025	31.8759	19.8266	6.96	1217
39	0.144	231.687	0.01	0.049	0.563	0.05	184.382	0.0306	1.79418	2.1765	51.4712	36.4673	15.0039	7.09	1240
40	0.02	142.026	0.01	0.071	11.87	0.05	36.975	0.1367	7.14293	12.3911	9.84949	1.13333	8.71616	5.61	680
41	0.02	128.768	0.042	0.056	13.853	0.05	32.025	0.1871	9.68371	15.3388	8.09222	0.559076	7.53314	5.43	602
42	0.02	127.327	0.041	0.047	10.814	0.05	35.674	0.1921	9.93577	14.9847	10.4269	1.85758	8.56929	5.53	602
43	0.195	116.778	0.107	0.02	1.305	0.05	113.178	0.2624	13.4798	16.8184	37.0087	19.4949	17.5138	6.93	871
44	0.206	120.912	0.019	0.02	1.201	0.05	144.906	0.1842	9.53752	12.3199	38.8674	20.1445	18.7228	6.94	941
45	0.201	127.64	0.01	0.02	2.112	0.05	132.278	0.1727	8.95777	11.9001	36.3435	19.3057	17.0378	7.34	625
46	0.02	122.198	0.01	0.055	29.116	0.05	21.004	0.2129	10.9844	20.4356	9.00381	-0.238492	9.00381	5.54	559
47	0.02	113.965	0.01	0.056	34.993	0.05	20.466	0.2643	13.5755	25.0904	8.70874	-0.895747	8.70874	5.39	563
48	0.02	112.11	0.01	0.02	0.1	0.05	23.897	0.2931	15.0274	26.6346	8.96345	-0.933148	8.96345	5.37	448
49	0.115	96.742	0.01	0.02	24.76	1.925	39.039	0.6054	30.7712	41.5318	25.0084	10.0595	14.9489	7.3	646
50	0.113	75.41	0.061	0.02	25.682	1.86	39.609	0.4357	22.2162	29.9142	24.7025	10.1708	14.5317	7.49	533
51	0.111	106.159	0.029	0.02	24.501	3.859	38.961	0.6839	34.7286	41.135	30.6302	11.1984	19.4318	7.15	690
52	0.115	85.132	0.038	0.02	25.407	4.105	39.245	0.5089	25.9064	33.1023	33.4947	11.5377	21.957	7.2	582
53
54

## Sheet: Batch 7
Batch VI
Listopadu 26	Fluoride	Chloride	Nitrite	Bromide	Nitrate	Phosphate	Sulfate	Ammonium dilution 50x (abs)	Conc	TN	TC	IC	TOC	pH	Conductivity
1	0.171	109.485	0.154	0.02	4.383	0.412	72.163	0.0544	2.99399	5.22267	23.4949	10.3969	13.098	7.34	680
2	0.156	96.737	0.445	0.02	8.951	0.39	87.189	0.149	7.763	12.1781	22.3508	9.66949	12.6813	7.3	657
3	0.179	106.434	0.176	0.02	4.238	0.358	82.331	0.0393	2.23276	3.90949	17.6728	4.9659	12.7069	6.95	641
4	0.036	103.153	0.18	0.091	19.919	0.05	55.436	0.1454	7.58152	17.4417	10.3859	0.566638	9.81922	6.05	578
5	0.02	100.518	0.043	0.043	17.499	0.05	46.262	0.0618	3.36704	12.6238	9.73209	0.440692	9.2914	5.97	526
6	0.02	117.788	0.027	0.083	18.418	0.343	49.41	0.1315	6.88078	12.5983	9.56681	-0.00548607	9.56681	5.99	574
7	0.225	108.31	0.772	0.02	1.757	0.05	96.374	0.1425	7.43532	9.71083	33.2534	14.6981	18.5553	7.16	694
8	0.218	89.772	0.659	0.074	19.761	0.368	78.316	0.2644	13.5806	22.1032	28.1183	12.0252	16.0931	7.65	657
9	0.243	94.776	0.265	0.105	22.279	0.447	67.021	0.2981	15.2795	24.6658	27.1738	10.8779	16.2959	7.2	626
10	0.033	97.795	0.026	0.066	33.583	0.443	41.738	0.2389	12.2951	22.3762	10.1166	-0.21919	10.1166	6.35	539
11	0.02	101.389	0.017	0.057	36.913	0.05	30.04	0.21	10.8382	21.4548	8.66015	-0.690022	8.66015	5.88	541
12	0.032	107.304	0.021	0.058	38.049	0.05	42.561	0.2823	14.483	26.3277	10.093	-0.529261	10.093	5.9	588
13	0.183	125.777	0.409	0.02	5.524	0.05	59.644	0.2331	12.0027	16.0706	23.4875	9.657	13.8305	6.88	709
14	0.127	105.2	0.107	0.02	4.248	0.05	51.617	0.2486	12.7841	16.9651	29.9555	17.2631	12.6923	6.95	657
15	0.121	117.16	0.215	0.02	10.543	0.643	54.07	0.3993	20.3812	28.1616	32.9843	17.106	15.8782	7.69	744
16	0.02	148.517	0.033	0.048	22.811	0.05	43.389	0.2932	15.0325	22.2858	10.0062	1.26118	8.74497	6.22	664
17	0.02	139.42	0.01	0.077	12.755	0.05	49.899	0.2229	11.4885	16.3131	7.7143	0.256978	7.45732	5.9	703
18	0.041	157.819	0.232	0.059	17.949	0.05	58.958	0.3984	20.3358	28.4463	17.1756	4.38506	12.7905	6.46	788
19	0.222	122.409	0.781	0.02	23.246	0.382	66.967	0.4932	25.1149	36.0994	26.5488	12.0395	14.5094	7.16	796
20	0.215	116.914	0.664	0.073	24.097	0.478	65.336	0.5185	26.3904	37.025	24.7551	10.4662	14.2889	7.29	762
21	0.02	116.876	0.62	0.02	25.084	0.446	55.91	0.5532	28.1397	39.5076	23.8171	9.86984	13.9473	7.35	739
22	0.02	128.508	0.051	0.229	39.621	0.05	37.155	0.4726	24.0764	37.0102	10.4692	-0.0485457	10.4692	5.65	700
23	0.02	135.587	0.01	0.074	40.416	0.05	26.454	0.5147	26.1988	37.7931	10.7571	-0.23938	10.7571	5.89	715
24	0.032	128.148	0.024	0.075	37.052	0.05	41.235	0.4805	24.4747	35.9685	10.1579	-0.672874	10.1579	5.71	627
25	0.16	110.451	0.08	0.074	3.214	0.05	115.819	0.1361	7.11268	8.01039	49.3215	31.4059	17.9156	7	870
26	0.201	115.067	0.01	0.02	0.793	0.05	11.542	0.0361	2.07144	1.70915	83.1083	58.8831	24.2252	7.05	873
27	0.154	109.758	0.02	0.02	1.361	0.05	112.538	0.039	2.21764	2.90815	57.278	39.4103	17.8676	7.87	895
28	0.02	98.755	0.091	0.066	16.521	0.05	61.641	0.1893	9.79462	13.5342	15.7015	4.4212	11.2803	6.99	546
29	0.02	110.264	0.249	0.062	16.774	0.05	56.242	0.1787	9.26025	14.7058	13.2825	2.89857	10.384	6.1	549
30	0.02	111.897	0.263	0.056	18.989	0.05	61.529	0.198	10.2332	14.831	15.3364	3.4829	11.8535	6.01	610
31	0.187	93.48	0.245	0.02	3.105	0.05	143.771	0.153	7.96465	9.98505	41.1286	21.9988	19.1297	7.14	835
32	0.177	101.238	0.118	0.02	3.399	0.05	180.279	0.1622	8.42844	9.94692	40.7592	19.8394	20.9198	7.32	955
33	0.14	96.845	0.779	0.02	2.292	0.05	0.1	0.1596	8.29737	9.79493	37.7074	20.5107	17.1967	7.76	905
34	0.02	102.923	0.036	0.052	35.647	0.05	45.65	0.2582	13.268	22.2273	11.1139	1.34125	9.7726	5.75	566
35	0.02	104.047	0.01	0.065	38.965	0.05	46.561	0.2355	12.1237	22.1037	15.4974	0.977785	14.5196	6.35	593
36	0.037	99.871	0.07	0.252	35.369	0.471	47.726	0.2462	12.6631	20.8944	12.7486	0.532386	12.2163	5.72	560
37	0.177	139.348	0.019	0.02	1.089	0.621	23.16	0.1659	8.61497	8.78448	67.1706	44.741	22.4297	7.7	937
38	0.118	144.111	0.01	0.041	6.268	0.05	145.649	0.0981	5.19701	7.07871	45.6558	30.806	14.8498	6.82	1143
39	0.16	141.991	0.01	0.046	2.838	0.05	135.521	0.1015	5.36841	5.83408	54.7085	36.026	18.6825	7.15	1034
40	0.02	137.915	0.147	0.05	14.847	0.05	43.515	0.2617	13.4445	18.1537	-3.92648	2.66857	0	5.94	716
41	0.048	121.41	0.589	0.041	17.092	0.05	53.768	0.3992	20.3762	27.1113	13.5244	2.92856	10.5959	6.96	660
42	0.046	127.553	0.092	0.053	18.42	0.05	54.904	0.2504	12.8748	28.6396	13.9348	3.44806	10.4868	5.95	725
43	0.186	116.662	0.01	0.02	1.753	0.05	94.385	0.3318	16.9784	18.5027	37.451	18.449	19.002	7.14	833
44	0.201	121.242	0.01	0.02	2.613	0.05	123.778	0.2528	12.9958	15.5501	38.0719	18.8085	19.2634	7.45	895
45	0.187	124.535	0.333	0.02	3.095	0.05	111.306	0.2644	13.5806	15.237	26.8019	17.191	9.61092	7.7	890
46	0.038	121.848	0.022	0.08	36.331	0.05	31.235	0.3642	18.6117	27.5269	12.1272	2.41604	9.71114	5.68	652
47	0.041	170.318	0.01	0.044	34.044	0.05	33.2	0.3991	20.3711	28.8503	10.426	-0.301825	10.426	6.86	631
48	0.042	116.265	0.01	0.065	32.622	0.05	33.331	0.395	20.1644	28.0577	9.47035	-0.580254	9.47035	5.68	631
49	0.123	109.429	0.079	0.02	25.368	2.042	39.977	0.6494	32.9894	41.9997	25.5365	9.562	15.9745	7.32	700
50	0.12	88.071	0.082	0.02	25.929	3.056	40.502	0.4942	25.1654	33.137	25.8716	10.541	15.3306	7.16	607
51	0.112	98.658	0.01	0.02	24.162	2.256	39.645	0.6033	30.6653	40.6493	29.9019	9.78618	20.1158	7.31	649
52	0.111	75.135	0.171	0.02	24.852	2.16	39.681	0.3942	20.1241	32.5225	30.3885	9.91161	20.4769	7.08	543
53
54

## Sheet: Batch 8
Batch VI
Listopadu 26	Fluoride	Chloride	Nitrite	Bromide	Nitrate	Phosphate	Sulfate	Ammonium dilution 50x (abs)	Conc	TN	TC	IC	TOC	pH	Conductivity
1	0.184	95.664	0.162	0.02	6.955	0.05	61.325	0.0982	5.20205	6.93051	24.0915	11.9519	12.1396	7.56	626
2	0.205	97.462	0.291	0.02	8.658	0.409	80.486	0.2398	12.3404	10.9251	22.5322	9.28562	13.2466	7.39	625
3	0.18	91.677	0.178	0.02	5.035	0.05	67.569	0.0954	5.0609	4.16614	14.9481	4.08667	10.8614	7.28	544
4	0.02	0.133	0.02	0.02	0.1	0.05	52.559	0.1784	9.24513	13.2835	9.82251	0.818879	9.00363	6.35	546
5	0.02	92.059	0.046	0.02	16.811	0.05	46.13	0.1325	6.9312	10.8162	8.4886	0.202036	8.28657	5.97	492
6	0.037	106.9	0.02	0.045	13.433	0.344	43.191	0.1184	6.22038	8.17738	6.16282	-0.516925	6.16282	5.85	522
7	0.236	96.201	1.123	0.02	8.215	0.05	0.1	0.1499	7.80837	8.92337	24.3144	10.2824	14.032	7.18	539
8	0.224	89.39	0.298	0.02	24.917	0.506	60.009	0.3084	15.7987	-0.541375	-1.34287	-2.16375	0	7.27	615
9	0.02	0.149	98.82	0.02	0.1	0.501	60.977	0.3225	16.5095	-0.533233	-1.34287	-2.16375	0	7.72	622
10	0.02	98.301	0.02	0.046	33.562	0.05	31.61	0.1697	8.80654	16.7	12.51	1.37	11.5	5.64	521
11	0.02	94.245	0.026	0.051	32.481	0.464	31.437	0.1732	8.98298	21.19	19.4	1.32	18.08	5.57	502
12	0.02	102.962	0.02	0.057	37.467	0.05	29.811	0.1829	9.47198	21.12	13.1	0.94	12.16	5.58	539
13	0.186	118.573	0.3	0.02	7.835	0.05	60.577	0.2358	12.1388	16.81	24.91	8.43	16.48	6.76	683
14	0.168	110.141	1.677	0.02	5.277	0.05	66.888	0.3674	18.7731	25.1	22.58	8.75	13.82	7.02	674
15	0.143	113.452	0.236	0.02	14.835	0.05	50.724	0.4716	24.026	30.98	30.37	12.21	18.17	7.71	703
16	0.02	123.018	0.03	0.04	16.146	0.05	40.639	0.3322	16.9985	21.92	19.32	3.5	15.82	5.57	590
17	0.032	122.401	0.035	0.06	14.817	0.05	47.634	0.2934	15.0425	22.82	18.43	2.42	16.01	5.66	637
18	0.034	123.439	0.081	0.02	12.848	0.05	49.405	0.2978	15.2644	21.32	17.66	4.22	13.44	6.85	649
19	0.219	118.024	1.696	0.02	-0.081	0.05	59.337	0.6401	32.5205	34.84	30.21	11.76	18.45	7.71	778
20	0.227	110.61	0.306	0.02	24.227	0.449	52.446	0.5378	27.3633	38.87	26.28	8.45	17.84	7.45	713
21	0.208	124.361	0.542	0.02	27.352	0.424	61.959	0.6004	30.5191	41.17	27.09	9.48	17.61	7.39	808
22	0.031	118.612	0.02	0.045	34.173	0.05	33.753	0.4467	22.7708	34.25	12.11	0.78	11.33	5.72	636
23	0.02	125.049	0.02	1.037	0.1	0.05	24.418	0.4442	22.6447	37.68	15.89	1.78	14.1	5.28	630
24	0.02	126.774	0.02	0.054	37.758	0.05	25.467	0.3986	20.3459	36.04	16.56	1.7	14.86	5.26	642
25	0.157	126.314	0.02	0.02	3.938	0.05	242.151	0.1346	7.03706	6.9	56.93	36.75	20.18	8.01	1286
26	0.138	111.466	0.02	0.02	0.691	0.05	40.065	0.0649	3.52332	3.91	102.79	41.74	61.04	7.09	824
27	0.148	101.005	0.062	0.02	2.469	0.05	79.757	0.0866	4.61727	4.46	62.24	39.14	23.1	7.13	785
28	0.02	96.883	0.081	0.044	13.394	0.05	51.131	0.137	7.15805	13.49	20.01	5.38	14.63	5.8	511
29	0.02	113.819	0.272	0.053	10.664	0.05	50.826	0.1042	5.50453	10.05	16.96	4.82	12.14	5.75	585
30	0.02	105.832	0.274	0.055	19.505	0.05	61.236	0.1852	9.58793	18.01	16.32	5.6	10.72	5.68	532
31	0.171	97.348	0.347	0.02	9.173	0.05	135.57	0.1796	9.30562	12.88	43.73	23.15	20.58	7.14	847
32	0.176	96.991	0.531	0.02	4.629	0.05	166.739	0.1816	9.40644	10.45	42.82	22.01	20.81	7.88	912
33	0.198	95.596	0.678	0.02	6.2	0.05	146.435	0.1657	8.60489	12.26	36.1	20.27	15.83	7.33	867
34	0.039	116.84	0.024	0.062	41.811	0.05	41.898	0.2797	14.3519	23.74	13.34	1.47	11.87	5.55	634
35	0.043	0.1	0.02	0.071	39.358	0.05	54.284	0.1571	8.17134	26.67	13.95	1.39	12.56	5.71	646
36	0.061	120.52	0.032	0.088	42.246	0.05	57.746	0.2877	14.7552	28.62	16.07	1.19	14.89	5.75	706
37	0.045	0.1	144.988	2.574	-0.114	0.05	37.649	0.0658	3.56869	3.17	78.96	57.04	21.92	7.15	1097
38	0.125	148.049	0.02	0.065	2.118	0.05	186.726	0.0413	2.33359	3.14	55.37	28.18	27.2	7.01	1206
39	0.153	136.575	0.071	0.02	1.696	0.05	180.471	0.1292	6.76484	8.19	40.22	24.76	15.46	7.81	1113
40	0.053	134.971	0.083	0.06	15.778	0.05	45.05	0.2986	15.3047	20.23	11.06	2.13	8.93	5.67	708
41	0.047	113.725	0.536	0.044	21.39	0.05	63.825	0.4699	23.9403	31.62	28.54	3.21	25.38	6.11	652
42	0.055	120.075	0.173	0.047	18.668	0.05	53.654	0.4737	24.1319	29.6	14.23	4.14	10.09	6.11	677
43	0.198	115.37	0.554	0.02	4.579	0.336	83.29	0.3691	18.8588	23.36	45.57	17.23	28.34	7.45	802
44	0.199	118.613	0.061	0.02	2.193	0.05	115.713	0.2807	14.4023	17.84	36.18	18.91	17.27	7.76	878
45	0.194	121.427	0.16	0.02	3.856	0.05	98.711	0.2867	14.7048	19.35	36.73	20.02	16.71	7.84	864
46	0.052	127.59	0.02	0.073	39.217	0.05	16.694	0.2857	14.6544	26.29	25.13	1.67	23.46	5.37	629
47	0.05	121.843	0.02	0.058	36.852	0.05	18.948	0.5585	28.4069	26.64	9.03	-0.14	9.03	5.27	607
48	0.052	119.867	0.024	0.074	35.291	0.05	19.957	0.3222	16.4944	27.38	9.48	-0.38	9.48	5.3	610
49	0.118	98.585	0.037	0.02	24.829	2.609	39.112	0.5864	29.8134	39.45	26.67	10.11	16.56	7.25	646
50	0.115	75.888	0.032	0.02	25.214	2.629	39.569	0.4122	21.0315	29.26	47.66	12.24	35.43	7.09	484
51
52
53
54

## Sheet: Organics all
5-Me-BTR	BSPS-S	MTP tart	DCF	Effluents	Batch			Batch	Influents		5-Me-BTR	BSPS-S	MTP tart	DCF
1.3113	0	0	0.9533	S+P+A-Am	1			1	SGW with NH4+		4.10259	4.8491	5.0664	4.83444
1.209	1.0665	0	0.8095	S+P+A-Am	1			1	SGW wo NH4+		4.0904	4.95981	5.1237	4.8899
1.4897	1.4528	0	0.8994	S+P+A-Am	1			2	SGW with NH4+		3.918	4.82425	4.85115	4.7123
2.1804	2.394	2.7578	0	M+P+A-Am	1			2	SGW wo NH4+		4.0133	4.96155	4.98295	4.83905
1.5627	1.3467	2.1189	0	M+P+A-Am	1			3	SGW with NH4+		3.6943	3.00075	2.3626	3.85265
2.1067	2.0401	1.9613	0	M+P+A-Am	1			3	SGW wo NH4+		3.77755	3.15175	2.45695	3.9302
2.5607	1.7605	0	0.849	S-P+A-Am	1			4	SGW with NH4+		4.011	4.9682	5.4843	5.0355
3.1449	2.5535	0	1.1371	S-P+A-Am	1			4	SGW wo NH4+		4.0023	5.0853	5.5369	5.094
3.4045	2.753	0	0.9119	S-P+A-Am	1			5	SGW with NH4+		4.1212	4.7919	4.9901	4.6881
3.5713	3.2567	2.5227	0	M-P+A-Am	1			5	SGW wo NH4+		4.2117	4.9393	5.1237	4.8564
3.0856	2.6665	2.1792	0.2194	M-P+A-Am	1			6	SGW with NH4+		4.1614	4.899	5.2828	4.9468
2.6847	2.3859	2.1768	0.217	M-P+A-Am	1			6	SGW wo NH4+		4.276	5.0222	5.323	5.0443
0.7631	0.8571	0	0.244	S+P+A+Am	1			7	SGW with NH4+		4.1222	4.8802	5.0664	4.9014
1.6676	1.0883	0	1.0938	S+P+A+Am	1			7	SGW wo NH4+		3.8746	4.9749	5.1716	4.951
2.7474	1.6956	0	0.8323	S+P+A+Am	1			8	SGW with NH4+		4.1695	4.9802	5.2198	4.9271
0.9688	0.8174	1.1274	0.257	M+P+A+Am	1			8	SGW wo NH4+		4.2168	4.9209	5.1913	4.9134
0.938	0.9215	1.2805	1.2257	M+P+A+Am	1
0.6398	0.6502	1.3264	0.0404	M+P+A+Am	1
4.1177	3.2615	0	1.59	S-P+A+Am	1
3.7266	2.7098	0.933	1.2179	S-P+A+Am	1
4.133	3.2495	1.0167	0.9581	S-P+A+Am	1
3.9304	3.4074	2.9484	0.2084	M-P+A+Am	1
5.159	4.7133	3.1442	0.2175	M-P+A+Am	1
5.6838	5.1892	3.2845	0.2046	M-P+A+Am	1
1.118	1.5816	0	0.9938	S+P-A-Am	1
0.5684	0.772	0	0.4559	S+P-A-Am	1
1.1011	1.2549	0	0.5694	S+P-A-Am	1
3.2882	3.2255	3.5231	0.0025	M+P-A-Am	1
3.3469	3.543	4.4931	0	M+P-A-Am	1
2.3729	2.4206	2.9943	0.0367	M+P-A-Am	1
0.6841	0.933	0	0.2714	S-P-A-Am	1
0.6536	0.7885	0	0.2045	S-P-A-Am	1
0.7648	0.8582	0	0.631	S-P-A-Am	1
3.4654	3.1196	2.7393	0	M-P-A-Am	1
3.0515	2.8479	1.7976	0.2151	M-P-A-Am	1
3.5519	3.3413	2.0161	0	M-P-A-Am	1
0.7041	0.9846	0	0.4544	S+P-A+Am	1
0.4019	0.8659	0	0.4332	S+P-A+Am	1
0.4066	0.8646	0	0.4407	S+P-A+Am	1
2.3481	2.5154	3.8562	0	M+P-A+Am	1
2.6739	2.4275	4.3098	0	M+P-A+Am	1
1.3083	1.5323	2.2913	0	M+P-A+Am	1
1.5121	1.6611	0	0.8507	S-P-A+Am	1
1.134	1.3449	0	0.6401	S-P-A+Am	1
1.2558	1.3272	0	0.5146	S-P-A+Am	1
4.8762	4.4862	2.75	0.0385	M-P-A+Am	1
4.8479	4.2376	2.9657	0.0374	M-P-A+Am	1
4.9178	4.439	3.0093	0.0474	M-P-A+Am	1
1.7324	0.1984	0	1.3276	S+P+A-Am	2
2.3351	1.5317	0	1.7753	S+P+A-Am	2
2.0146	1.5718	0	1.2842	S+P+A-Am	2
2.5362	2.7856	4.2111	0.0857	M+P+A-Am	2
1.7556	1.5782	4.202	0.3274	M+P+A-Am	2
3.0183	3.0501	3.4663	0.2873	M+P+A-Am	2
3.3315	2.483	0	1.5395	S-P+A-Am	2
3.7139	3.2064	0	1.7861	S-P+A-Am	2
4.0668	3.4729	0	1.6333	S-P+A-Am	2
3.3644	3.1988	2.8413	0.2726	M-P+A-Am	2
3.0537	2.8341	2.2932	0.3393	M-P+A-Am	2
3.144	2.93	2.7843	0.2775	M-P+A-Am	2
1.0326	0.5987	0	0.4993	S+P+A+Am	2
1.7871	0.7171	0	1.2117	S+P+A+Am	2
2.9874	1.8161	0	1.1328	S+P+A+Am	2
1.9454	1.8352	3.5844	0.3311	M+P+A+Am	2
0.9686	1.0004	2.7418	0.3237	M+P+A+Am	2
0.8159	0.9	3.1451	0.3325	M+P+A+Am	2
4.8695	4.1697	1.5173	2.0594	S-P+A+Am	2
4.3148	3.4448	1.3777	1.5659	S-P+A+Am	2
4.4794	3.8095	1.4422	1.5593	S-P+A+Am	2
5.3308	5.0896	3.6636	0.0848	M-P+A+Am	2
6.0642	5.7402	3.7874	0.0841	M-P+A+Am	2
6.4044	5.8196	4.0654	0.0798	M-P+A+Am	2
1.8906	1.8148	0	1.8512	S+P-A-Am	2
1.5367	1.218	0	1.3703	S+P-A-Am	2
2.005	1.2262	0	1.2639	S+P-A-Am	2
3.4212	3.5482	4.2126	0.0451	M+P-A-Am	2
2.3951	2.6543	3.2022	0.0409	M+P-A-Am	2
3.4314	3.5112	4.0991	0.0388	M+P-A-Am	2
19.4875	0.6727	0	0	S-P-A-Am	2
0.9758	0.6054	0	0.357	S-P-A-Am	2
1.7079	1.2324	0	0.8318	S-P-A-Am	2
4.0472	3.9909	3.3232	0.0328	M-P-A-Am	2
3.5433	3.4151	2.4512	0.0448	M-P-A-Am	2
3.8554	3.7293	2.7386	0.2735	M-P-A-Am	2
2.51	2.2108	0	1.875	S+P-A+Am	2
1.5075	0.9179	0	0.9309	S+P-A+Am	2
1.9426	1.6786	0	1.2603	S+P-A+Am	2
2.739	3.0314	4.6017	0.032	M+P-A+Am	2
3.3521	3.4158	4.5019	0.0312	M+P-A+Am	2
2.6096	2.4235	3.5652	0.034	M+P-A+Am	2
2.1992	1.8496	1.0497	1.5213	S-P-A+Am	2
1.4025	0.9958	0	0.7792	S-P-A+Am	2
2.2305	1.9391	0	1.0945	S-P-A+Am	2
5.1273	4.9995	3.1234	0.0856	M-P-A+Am	2
5.0133	4.7083	3.3415	0.0846	M-P-A+Am	2
5.2921	4.8738	3.6381	0.0875	M-P-A+Am	2
1.5838	0.3915	0	0.9403	S+P+A-Am	3
2.0695	1.1345	0	1.2577	S+P+A-Am	3
2.5341	2.0673	0	1.5538	S+P+A-Am	3
2.8416	2.9368	4.4409	0	M+P+A-Am	3
1.983	1.6677	4.4422	0	M+P+A-Am	3
3.4556	3.3382	4.2249	0	M+P+A-Am	3
3.5598	2.5005	0	1.2769	S-P+A-Am	3
4.2151	3.8654	0	2.364	S-P+A-Am	3
4.5446	4.0782	0	2.5273	S-P+A-Am	3
4.5066	4.3163	3.6917	0	M-P+A-Am	3
3.1616	2.8851	2.2268	0	M-P+A-Am	3
4.1197	3.9896	3.5372	0	M-P+A-Am	3
1.4994	1.0022	0	0.5237	S+P+A+Am	3
2.3007	0.6788	0	1.1916	S+P+A+Am	3
3.2682	1.919	0	1.5784	S+P+A+Am	3
1.817	1.8013	3.7471	0	M+P+A+Am	3
1.4995	1.4616	0	0	M+P+A+Am	3
1.4283	1.2803	3.6016	0	M+P+A+Am	3
5.0569	4.6411	1.857	2.3096	S-P+A+Am	3
4.0996	0.001	1.5615	0.6246	S-P+A+Am	3
4.2489	0	1.5845	0	S-P+A+Am	3
6.2912	5.7911	4.411	0	M-P+A+Am	3
6.3111	6.1397	4.6061	0	M-P+A+Am	3
6.3014	5.8941	4.3269	0	M-P+A+Am	3
0	1.0287	0	0.7426	S+P-A-Am	3
1.2519	0.9003	0	0.9346	S+P-A-Am	3
1.0411	0.7082	0	0.4686	S+P-A-Am	3
3.1459	3.335	4.2232	0	M+P-A-Am	3
3.556	3.9151	5.431	0	M+P-A-Am	3
3.5861	3.6816	4.4915	0	M+P-A-Am	3
1.264	0.7905	0	0.3939	S-P-A-Am	3
1.3009	0.7787	0	0.2553	S-P-A-Am	3
1.2421	0.74	0	0.2639	S-P-A-Am	3
4.1742	4.0326	3.5696	0	M-P-A-Am	3
4.1676	4.0906	3.0707	0	M-P-A-Am	3
3.977	4.1646	2.7247	0	M-P-A-Am	3
1.9482	1.7265	0	1.2226	S+P-A+Am	3
1.0448	0.533	0	0.2775	S+P-A+Am	3
1.6599	1.3496	0	0.8085	S+P-A+Am	3
3.1612	3.66	6.4918	0	M+P-A+Am	3
3.7228	3.82	4.9561	0	M+P-A+Am	3
2.3802	2.3162	3.7831	0	M+P-A+Am	3
2.5395	2.0591	0	1.495	S-P-A+Am	3
1.8457	1.3758	0	0.915	S-P-A+Am	3
2.3113	1.8499	0	0.9673	S-P-A+Am	3
5.6577	5.6404	4.3653	0	M-P-A+Am	3
5.6661	5.2957	4.2807	0	M-P-A+Am	3
5.6885	5.3499	4.0366	0	M-P-A+Am	3
2.1208	0.9522	1.0227	2.0684	S+P+A-Am	4
2.194	1.5234	0.5634	2.1266	S+P+A-Am	4
1.6415	1.4145	1.2595	1.1334	S+P+A-Am	4
2.3415	2.4638	2.956	0	M+P+A-Am	4
2.7688	2.6308	3.0166	0	M+P+A-Am	4
2.2556	0.0261	2.6068	0	M+P+A-Am	4
3.2274	2.4387	0.4723	1.7585	S-P+A-Am	4
3.8178	3.0831	1.1365	2.0093	S-P+A-Am	4
4.1048	3.3387	1.1077	1.9035	S-P+A-Am	4
3.0537	0.1332	2.9969	0	M-P+A-Am	4
2.8431	0.1421	2.5542	0	M-P+A-Am	4
3.6579	0.1941	3.8513	0	M-P+A-Am	4
1.9807	1.5289	0.7067	1.2126	S+P+A+Am	4
2.0828	0.8217	0.2061	2.0237	S+P+A+Am	4
1.9815	0.9592	1.0622	1.095	S+P+A+Am	4
2.6455	0.7213	3.0322	0	M+P+A+Am	4
1.418	0.2913	2.1871	0	M+P+A+Am	4
1.8071	0.1135	2.5064	0	M+P+A+Am	4
4.6278	4.2167	1.8008	3.5239	S-P+A+Am	4
4.3787	3.9976	1.4645	3.4013	S-P+A+Am	4
4.4881	4.5258	1.8534	3.5315	S-P+A+Am	4
4.3851	0.2773	3.5708	0	M-P+A+Am	4
5.1193	0.3361	4.214	0	M-P+A+Am	4
5.1749	0.4189	4.121	0	M-P+A+Am	4
1.0964	0.8904	0.068	0.6717	S+P-A-Am	4
1.1656	0.8321	0.231	0.8669	S+P-A-Am	4
1.7285	1.2896	0.7369	1.2694	S+P-A-Am	4
2.0332	2.1436	2.1094	0	M+P-A-Am	4
2.8828	3.1236	3.7493	0	M+P-A-Am	4
3.2607	3.4557	3.7093	0.0196	M+P-A-Am	4
2.0639	1.3739	0.246	1.0682	S-P-A-Am	4
1.8416	1.0234	0.0665	0.6005	S-P-A-Am	4
1.8647	1.1026	0.41	0.6996	S-P-A-Am	4
3.5392	3.5373	3.2026	0	M-P-A-Am	4
3.6607	3.5809	3.2996	0	M-P-A-Am	4
4.0241	4.0977	3.9268	0	M-P-A-Am	4
1.358	1.0747	0.0291	0.9063	S+P-A+Am	4
1.9023	1.0699	0.3023	1.1221	S+P-A+Am	4
1.5459	1.1865	0	0.9268	S+P-A+Am	4
3.2575	3.7932	3.9309	0.1753	M+P-A+Am	4
2.972	3.1726	3.5403	0	M+P-A+Am	4
3.3144	3.4835	4.1337	0.2992	M+P-A+Am	4
3.1466	2.4538	1.6238	2.0817	S-P-A+Am	4
2.4317	1.7372	0.8401	1.357	S-P-A+Am	4
2.7485	1.9301	0.6489	1.2892	S-P-A+Am	4
4.9901	4.9944	4.2055	0	M-P-A+Am	4
4.8324	4.7417	4.3184	0	M-P-A+Am	4
4.8734	4.8209	4.6934	0	M-P-A+Am	4
2.3467	0.3078	0.7599	1.5588	S+P+A-Am	5
2.4646	0.2661	0.8317	1.5782	S+P+A-Am	5
1.8357	0.0591	1.6259	0.4926	S+P+A-Am	5
2.7508	0.6109	3.4866	0	M+P+A-Am	5
2.54	0.4942	3.5395	0	M+P+A-Am	5
3.5957	0.8663	4.0589	0	M+P+A-Am	5
3.0374	0.0711	0.2301	0.6792	S-P+A-Am	5
3.8592	0.9087	1.0242	2.3211	S-P+A-Am	5
4.093	1.0888	1.1445	2.7669	S-P+A-Am	5
3.8452	0.8366	3.7236	0	M-P+A-Am	5
3.6455	0.7607	3.5586	0	M-P+A-Am	5
3.7157	0.7502	3.4941	0	M-P+A-Am	5
1.783	0.134	0.8008	0.6238	S+P+A+Am	5
1.9566	0	0.6174	0.1522	S+P+A+Am	5
2.0872	0.2386	1.4977	0.8949	S+P+A+Am	5
1.9292	0.4374	2.6896	0	M+P+A+Am	5
1.5146	0.4014	2.464	0	M+P+A+Am	5
1.7508	0.3893	2.6653	0	M+P+A+Am	5
4.0799	0.5036	1.7352	2.3076	S-P+A+Am	5
4.0327	0.1683	1.6972	1.9156	S-P+A+Am	5
4.0514	0.4071	1.7318	2.0329	S-P+A+Am	5
5.2358	1.2837	3.9532	0	M-P+A+Am	5
4.93	1.3281	4.0349	0	M-P+A+Am	5
4.6419	1.1517	3.8965	0	M-P+A+Am	5
1.2633	0	0.2502	0	S+P-A-Am	5
1.0227	0.0226	0.3266	0	S+P-A-Am	5
1.136	0.0267	0.3599	0	S+P-A-Am	5
2.5543	0.6061	2.9607	0	M+P-A-Am	5
2.1807	0.3851	3.1738	0	M+P-A-Am	5
2.7416	0.0479	3.4981	0	M+P-A-Am	5
2.071	0.0041	0.1372	0.3002	S-P-A-Am	5
2.2303	0	0.6789	0.3353	S-P-A-Am	5
2.1504	0	0.6831	0.2617	S-P-A-Am	5
3.2288	0.6403	3.2575	0	M-P-A-Am	5
3.463	0.3481	3.3494	0	M-P-A-Am	5
3.5369	0.553	3.0944	0	M-P-A-Am	5
1.6715	0	0.3696	0.1502	S+P-A+Am	5
1.7387	0	0.2091	0.2945	S+P-A+Am	5
1.7612	0	0.5269	0.2671	S+P-A+Am	5
1.7645	0.0768	3.1232	0	M+P-A+Am	5
2.5951	0.7392	3.6368	0	M+P-A+Am	5
2.1932	0.0258	2.8001	0	M+P-A+Am	5
3.0729	0.0184	1.6971	0.9854	S-P-A+Am	5
2.4003	0	0.2676	0.4023	S-P-A+Am	5
2.6679	0.0015	0.3948	0.5116	S-P-A+Am	5
4.5727	0.0695	3.4314	0	M-P-A+Am	5
4.4555	0.0326	3.481	0	M-P-A+Am	5
4.714	1.1119	4.1117	0	M-P-A+Am	5
2.3388	1.6109	0.9778	2.5438	S+P+A-Am	6
2.7399	1.8872	0.7977	2.6621	S+P+A-Am	6
2.5093	2.1976	1.2963	2.4428	S+P+A-Am	6
3.1207	2.8318	3.5787	0	M+P+A-Am	6
3.2217	2.7769	3.7006	0	M+P+A-Am	6
3.2275	2.8263	3.496	0	M+P+A-Am	6
3.3176	2.2774	0.4837	2.1014	S-P+A-Am	6
4.0206	3.6474	0.9762	3.7049	S-P+A-Am	6
4.3347	3.9595	0.986	4.3309	S-P+A-Am	6
4.5746	3.8335	4.2093	0	M-P+A-Am	6
4.0284	3.4937	3.6414	0	M-P+A-Am	6
4.0424	3.6684	3.7187	0	M-P+A-Am	6
1.6997	1.1275	0.2795	1.2091	S+P+A+Am	6
2.0179	0.7168	0.3663	1.8775	S+P+A+Am	6
3.2346	2.4838	1.6651	2.9586	S+P+A+Am	6
3.5485	3.2408	4.1142	0	M+P+A+Am	6
2.3606	2.0707	3.1672	0	M+P+A+Am	6
2.3535	2.1127	3.0931	0.2411	M+P+A+Am	6
4.6037	4.4994	1.9121	4.3664	S-P+A+Am	6
4.3019	3.7296	1.6146	3.6884	S-P+A+Am	6
4.3315	3.883	1.6004	3.8103	S-P+A+Am	6
4.3225	3.9607	3.5664	0	M-P+A+Am	6
5.2566	4.9016	4.1319	0	M-P+A+Am	6
5.2855	4.6631	3.8919	0	M-P+A+Am	6
1.0656	0.9407	0.1394	0.7236	S+P-A-Am	6
1.3095	0.8762	0.2627	1.1517	S+P-A-Am	6
1.756	1.1891	0.8288	1.4574	S+P-A-Am	6
2.3724	2.2322	2.4801	0	M+P-A-Am	6
2.7718	2.6055	3.2497	0	M+P-A-Am	6
2.7014	2.5172	2.7729	0.0448	M+P-A-Am	6
2.4564	1.5261	0.1768	1.4818	S-P-A-Am	6
2.3747	1.3259	0.1814	1.0322	S-P-A-Am	6
2.4123	1.4732	0.3179	1.1934	S-P-A-Am	6
3.8383	3.5821	3.7233	0	M-P-A-Am	6
3.9345	3.6298	3.4941	0	M-P-A-Am	6
4.0679	3.3836	3.6857	0	M-P-A-Am	6
1.8713	1.6075	0.3883	1.639	S+P-A+Am	6
1.6095	1.2413	0.2311	1.135	S+P-A+Am	6
1.0303	0.4292	0	0.5172	S+P-A+Am	6
2.2343	2.2094	3.3089	0	M+P-A+Am	6
2.6014	2.4215	2.8529	0	M+P-A+Am	6
2.2013	1.9342	2.5402	0.0187	M+P-A+Am	6
3.3114	2.5183	0.926	2.521	S-P-A+Am	6
2.9425	1.9278	0.096	1.8158	S-P-A+Am	6
2.9565	1.7983	0.067	1.6448	S-P-A+Am	6
3.9326	3.6083	2.8511	0	M-P-A+Am	6
4.7265	4.3237	3.4859	0	M-P-A+Am	6
4.7855	4.4492	3.8453	0	M-P-A+Am	6
3.0096	1.8376	1.7608	2.9066	S+P+A-Am	7
3.1969	2.2879	1.4597	3.2738	S+P+A-Am	7
2.918	2.556	1.8668	2.8417	S+P+A-Am	7
3.7905	3.2311	4.6437	0	M+P+A-Am	7
3.4105	2.7357	4.6698	0	M+P+A-Am	7
3.4162	2.8021	4.0717	0	M+P+A-Am	7
3.7174	3.1388	0.9669	3.2469	S-P+A-Am	7
4.03	3.6956	1.3871	3.8226	S-P+A-Am	7
4.3841	4.0352	1.6482	4.4188	S-P+A-Am	7
4.6559	4.0587	4.5368	0	M-P+A-Am	7
4.2039	3.5846	3.6786	0	M-P+A-Am	7
4.7202	4.1109	4.7928	0	M-P+A-Am	7
3.1497	2.5254	1.5028	3.3251	S+P+A+Am	7
2.7767	1.6172	0.9158	2.7473	S+P+A+Am	7
3.593	2.8717	2.9831	3.0535	S+P+A+Am	7
3.2381	2.9934	4.2489	0	M+P+A+Am	7
2.2766	1.8762	3.862	0	M+P+A+Am	7
3.6854	3.0647	5.3646	0.296	M+P+A+Am	7
4.6313	4.0434	2.2087	4.2447	S-P+A+Am	7
4.3367	3.7717	1.7591	4.0419	S-P+A+Am	7
4.4867	4.0849	2.1995	4.481	S-P+A+Am	7
5.4102	4.6896	4.6856	0	M-P+A+Am	7
5.7546	4.9937	4.8809	0	M-P+A+Am	7
5.351	4.8332	4.9786	0	M-P+A+Am	7
2.8928	2.5806	1.0885	2.8716	S+P-A-Am	7
1.7965	1.0623	0.8035	1.5833	S+P-A-Am	7
1.897	1.4466	0.6485	1.4967	S+P-A-Am	7
3.264	2.9842	4.6634	0.1681	M+P-A-Am	7
3.7215	3.3118	5.4315	0.1953	M+P-A-Am	7
3.4994	3.2405	4.5273	0.2263	M+P-A-Am	7
3.3148	2.2818	1.0707	2.4026	S-P-A-Am	7
3.0901	2.029	1.1425	1.8365	S-P-A-Am	7
3.0248	2.021	0.9668	1.8547	S-P-A-Am	7
4.6701	4.1583	4.7457	0.1577	M-P-A-Am	7
4.7736	4.2634	4.9368	0.0638	M-P-A-Am	7
4.7581	4.0974	4.959	0.023	M-P-A-Am	7
2.5693	1.9087	1.2348	2.1658	S+P-A+Am	7
1.7663	1.0174	0.5723	1.2685	S+P-A+Am	7
2.2951	1.7784	0.6739	1.9433	S+P-A+Am	7
2.9307	2.7982	5.1183	0.0998	M+P-A+Am	7
3.9304	3.7804	5.3416	0.1782	M+P-A+Am	7
3.756	3.4636	4.967	0.6931	M+P-A+Am	7
3.8465	2.9352	2.0842	3.1071	S-P-A+Am	7
3.3806	2.2695	1.1402	2.4264	S-P-A+Am	7
3.5716	2.4251	0.5279	2.4134	S-P-A+Am	7
5.0642	4.5614	4.2888	0	M-P-A+Am	7
5.0122	4.5275	4.5531	0	M-P-A+Am	7
4.9941	4.5601	4.607	0	M-P-A+Am	7
3.037	2.0976	1.5302	2.8922	S+P+A-Am	8
3.2587	2.5301	1.4765	3.2867	S+P+A-Am	8
2.9106	2.6532	1.6772	2.8051	S+P+A-Am	8
3.4903	3.2361	3.6488	0	M+P+A-Am	8
3.2591	2.8576	2.9865	0	M+P+A-Am	8
2.9935	2.4954	2.68	0	M+P+A-Am	8
3.8042	3.2978	0.5276	3.4947	S-P+A-Am	8
4.406	4.4894	1.4874	4.6617	S-P+A-Am	8
4.3556	4.0977	1.5155	4.4003	S-P+A-Am	8
4.0673	3.5935	3.6778	0	M-P+A-Am	8
4.1798	3.6976	3.5968	0	M-P+A-Am	8
3.9603	3.4802	3.5593	0	M-P+A-Am	8
3.3615	2.8558	1.2148	3.4318	S+P+A+Am	8
3.3591	2.4788	0.944	3.7779	S+P+A+Am	8
3.7505	3.2941	2.5782	3.4578	S+P+A+Am	8
2.7875	2.4987	3.8457	0	M+P+A+Am	8
2.5288	2.3073	3.8473	0.0056	M+P+A+Am	8
2.6561	2.3368	4.04	0.0303	M+P+A+Am	8
4.5057	4.2579	1.9938	4.267	S-P+A+Am	8
4.3774	4.1658	1.7344	4.4746	S-P+A+Am	8
4.7181	4.3138	2.138	4.7558	S-P+A+Am	8
4.9305	4.5058	4.3221	0	M-P+A+Am	8
5.352	4.7934	4.5425	0	M-P+A+Am	8
5.2818	4.6784	4.305	0	M-P+A+Am	8
1.6114	1.3493	0.9095	1.4666	S+P-A-Am	8
2.1986	1.4812	0.3332	1.957	S+P-A-Am	8
2.3259	1.9089	1.4188	2.0683	S+P-A-Am	8
3.0675	2.8059	4.2606	0	M+P-A-Am	8
2.6565	2.4637	3.7091	0	M+P-A-Am	8
3.3374	3.0003	3.5863	0.193	M+P-A-Am	8
3.234	2.2887	0.7023	2.3824	S-P-A-Am	8
2.855	1.8506	0.1868	1.7575	S-P-A-Am	8
3.1562	2.3311	0.578	2.1885	S-P-A-Am	8
5.5655	5.0799	5.3176	0	M-P-A-Am	8
6.0822	5.5051	6.2698	0	M-P-A-Am	8
6.6686	6.0721	7.1466	0	M-P-A-Am	8
1.3843	0.8728	0.2339	0.9422	S+P-A+Am	8
1.4976	0.5942	0.4124	0.8053	S+P-A+Am	8
2.217	1.7096	1.0306	1.826	S+P-A+Am	8
3.0514	2.9947	4.5276	0	M+P-A+Am	8
4.5589	4.2418	5.1949	0.0046	M+P-A+Am	8
3.784	3.5208	4.7728	0.5173	M+P-A+Am	8
3.8357	3.0069	0.9597	3.4759	S-P-A+Am	8
3.4143	2.427	0.7058	2.6599	S-P-A+Am	8
3.816	2.8184	1.2135	2.8182	S-P-A+Am	8
5.1972	4.6053	3.6771	0	M-P-A+Am	8
4.9297	3.8789	3.5099	0	M-P-A+Am	8
5.0683	4.5561	3.8668	0	M-P-A+Am	8

## Sheet: Chiral analysis
	C	C	C	PA	PA	PA
	MTP1	MTP2	MTP tot	MTP1	MTP2	MTP tot	E1/E2	EF from C				PA	PA
std0.01	0.005	0.005	0.01	347433	403293	750726	0.86149	0.5				MTP acid 1	MTP acid 2	MTP acid tot
std0.05	0.025	0.025	0.05	1299533	1557529	2857062	0.834356	0.5			1	965968	1046778	2012746
std0.1	0.05	0.05	0.1	3587073	4533666	8120739	0.791208	0.5			2	587095	708870	1295965
std0.5	0.25	0.25	0.5	19867624	24962424	44830048	0.795901	0.5			3	682636	785013	1467649
std1	0.5	0.5	1	35885097	46824293	82709390	0.766378	0.5			4	77949	78247	156196
std5	2.5	2.5	5	175715464	232714660	408430124	0.755068	0.5			5	104214	91949	196163
std10	5	5	10	313729459	404619027	718348486	0.77537	0.5			6	63100	61510	124610
	MTP1	MTP2		PA	PA	Ratio	EF				7	828655	1020088	1848743
1	0.386915	0.361713	0.748628	27597020	34017450	1.06967	0.516832	1			8	356021	427685	783706
2	0.329224	0.311967	0.641191	23930745	29920622	1.05532	0.513457	2			9	254127	358355	612482
3	0.383472	0.361407	0.744879	27378236	33992220	1.06105	0.514811	3			10			0
4	0.91675	0.894195	1.81094	61268028	77869827	1.02522	0.506227	4			11			0
5	0.908461	0.895731	1.80419	60741311	77996267	1.01421	0.503528	5			12			0
6	0.798296	0.760995	1.55929	53740312	66900140	1.04902	0.511961	6			13	605756	668176	1273932
7	0.241681	0.216413	0.458093	18367389	22051274	1.11676	0.52758	7			14	640221	776495	1416716
8	0.302919	0.283779	0.586698	22259086	27599250	1.06745	0.516311	8			15	1572188	1867773	3439961
9	0.395409	0.371484	0.766893	28136822	34822129	1.0644	0.515599	9			16	111423	77205	188628
10	1.003	0.944105	1.9471	66749192	81980116	1.06238	0.515124	10			17	233744	229905	463649
11	0.854899	0.776587	1.63149	57337427	68184200	1.10084	0.524	11			18	232995	272388	505383
12	1.05108	0.978726	2.0298	69804504	84831301	1.07392	0.517822	12			19	431749	471848	903597
13	0.258251	0.223959	0.48221	19420449	22672771	1.15312	0.535557	13			20	390272	530732	921004
14	0.174625	0.151525	0.32615	14105988	16707463	1.15245	0.535413	14			21	311783	312315	624098
15	0.662496	0.577191	1.23969	45110211	51763021	1.14779	0.534406	15			22			0
16	0.971957	0.830459	1.80242	64776437	72620798	1.17039	0.539252	16			23			0
17	0.853938	0.725137	1.57908	57276368	63947108	1.17762	0.540784	17			24			0
18	1.09467	0.929665	2.02434	72574902	80790922	1.17749	0.540755	18			25	993160	1134294	2127454
19	0.555049	0.452997	1.00805	38281972	41535132	1.22528	0.550619	19			26	1608918	1356506	2965424
20	0.419961	0.33539	0.755351	29697091	31849610	1.25216	0.555981	20			27	1146096	1389594	2535690
21	0.598085	0.480246	1.07833	41016892	43779184	1.24537	0.55464	21			28			0
22	1.90641	1.45149	3.3579	124160932	123765927	1.31341	0.567738	22			29			0
23	1.88296	1.52851	3.41146	122670635	130108216	1.2319	0.55195	23			30			0
24	1.26452	1.01551	2.28003	83368796	87860558	1.24521	0.554607	24			31	428203	502942	931145
25	0.221711	0.165355	0.387066	17098286	17846454	1.34081	0.572798	25			32	922586	1150985	2073571
26	0.180182	0.130666	0.310848	14459163	14989641	1.37895	0.579647	26			33	422583	489505	912088
27	0.124956	0.0846057	0.209562	10949533	11196372	1.47692	0.596273	27			34			0
28	0.967963	0.759147	1.72711	64522629	66747979	1.27507	0.560452	28			35			0
29	1.27534	1.00961	2.28495	84056600	87374630	1.2632	0.558149	29			36			0
30	1.04855	0.833143	1.88169	69643872	72841902	1.25855	0.557237	30			37	484248	625661	1109909
31	0.333409	0.250162	0.583571	24196750	24830668	1.33278	0.571326	31			38	1080621	1207856	2288477
32	0.334558	0.253685	0.588243	24269753	25120809	1.31879	0.568742	32			39	1441548	1849453	3291001
33	1.11023	0.871173	1.9814	73563814	75973809	1.27441	0.560326	33			40			0
34	1.22892	0.951597	2.18051	81106252	82597103	1.29143	0.56359	34			41			0
35	1.26869	0.966147	2.23483	83633582	83795381	1.31314	0.567687	35			42			0
36	2.57961	1.99285	4.57246	166942599	168349035	1.29443	0.564162	36			43	411898	511365	923263
37	0.34978	0.251238	0.601018	25237085	24919305	1.39222	0.581979	37			44	381276	457938	839214
38	0.34978	0.251238	0.601018	25237085	24919305	1.39222	0.581979	38			45	420212	599069	1019281
39	0.0721767	0.0715493	0.143726	7595412	10121118	1.00877	0.502183	39			46			0
40	0.897557	0.887306	1.78486	60048330	77302490	1.01155	0.502871	40			47			0
41	1.03828	1.03541	2.0737	68991546	89499763	1.00277	0.500692	41			48			0
42	0.978816	0.963375	1.94219	65212351	83567088	1.01603	0.503975	42			49			0
43	0.452249	0.410811	0.86306	31749037	38060886	1.10087	0.524007	43			50			0
44	0.271671	0.25491	0.526582	20273307	25221759	1.06575	0.515915	44			51			0
45	0.128478	0.10512	0.233598	11173368	12885789	1.22221	0.549997	45			52			0
46	1.04195	0.897774	1.93973	69224573	78164558	1.16059	0.537164	46
47	1.12368	0.938716	2.0624	74418680	81536287	1.19704	0.544843	47
48	1.09818	0.913344	2.01152	72797877	79446815	1.20237	0.545944	48
49	1.24086	1.04292	2.28378	81865247	90117803	1.1898	0.543337	49
50	1.33656	1.06859	2.40515	87947146	92232211	1.25077	0.555707	50
51	1.29965	1.08529	2.38495	85601534	93607738	1.19751	0.54494	51
52	1.26175	1.04729	2.30904	83192589	90477783	1.20477	0.546439	52
