# Supplementary material for: The resilience of constructed wetlands treating greywater: the effect of operating conditions and seasonal temperature decline
Source: Royal Society of Chemistry journal article supplement (doi:10.1039/d4ew00637b), 2024-01-01
Supplement: d4ew00637b2.pdf [file d4ew00637b2.pdf]

## Electronic supporting information (ESI) for

### **The resilience of constructed wetlands treating greywater: the effect of operating conditions and seasonal temperature decline**

Mayang Christy Perdana<sup>1</sup>, Adam Sochacki<sup>1\*</sup>, Fatma Öykü Çömez<sup>1</sup>, Adrián M.T. Silva<sup>2,3</sup>, Maria E. Tiritan<sup>4,5,6</sup>, Kateřina Berchová<sup>1</sup>, Zdeněk Chval<sup>7</sup>, Martin Lexa<sup>8</sup>, Tongxin Ren<sup>1</sup>, Luke Beesley<sup>9</sup>, Ana R.L. Ribeiro<sup>2,3</sup>, Jan Vymazal<sup>1</sup>

<sup>1</sup> Czech University of Life Sciences Prague, Faculty of Environmental Sciences, Department of Applied Ecology, Kamýcka 129, 165 21, Prague 6 Suchdol, Czech Republic

<sup>2</sup> LSRE-LCM - Laboratory of Separation and Reaction Engineering – Laboratory of Catalysis and Materials, Faculty of Engineering, University of Porto, Rua Dr. Roberto Frias, 4200-465 Porto, Portugal

<sup>3</sup> ALiCE - Associate Laboratory in Chemical Engineering, Faculty of Engineering, University of Porto, Rua Dr. Roberto Frias, 4200-465 Porto, Portugal

<sup>4</sup> TOXRUN—Toxicology Research Unit, University Institute of Health Sciences, CESPU, CRL, 458 116 Gandra, Portugal

<sup>5</sup> Centro Interdisciplinar de Investigação Marinha e Ambiental (CIIMAR/CIMAR), Universidade do Porto, Edifício do Terminal de Cruzeiros do Porto de Leixões, Av. General Norton de Matos s/n 4450-208 Matosinhos, Portugal

<sup>6</sup> Laboratório de Química Orgânica e Farmacêutica, Departamento de Ciências Químicas, Faculdade de Farmácia, Universidade do Porto, Rua de Jorge Viterbo Ferreira, 228, 4050-313 Porto, Portugal

<sup>7</sup> Institute of Laboratory Diagnostics and Public Health, Faculty of Health and Social Studies, University of South Bohemia, J. Boreckého 27, 37011, České Budějovice, Czech Republic

<sup>8</sup> Czech University of Life Sciences Prague, Faculty of Forestry and Wood Sciences, Department of Department of Wood Processing and Biomaterials, Kamýcká 129, 165 00 Prague 6, Czech Republic

<sup>9</sup> Czech University of Life Sciences Prague, Faculty of Environmental Sciences, Department of Environmental Geosciences, Kamýcka 129, 165 21, Prague 6 Suchdol, Czech Republic

\*Corresponding author. Tel. +420 224 38 2993; E-mail addresses: sochacki@fzp.czu.cz

## ESI 1. Properties of the studied compounds

| Name                               | 5-Methylbenzotriazole                                                             | Bisphenol S                                                                       | Metoprolol                                                                          | Diclofenac                                                                          | Metoprolol acid                                                                     |
|------------------------------------|-----------------------------------------------------------------------------------|-----------------------------------------------------------------------------------|-------------------------------------------------------------------------------------|-------------------------------------------------------------------------------------|-------------------------------------------------------------------------------------|
| Molecular Formula                  | $C_7H_7N_3$                                                                       | $C_{12}H_{10}O_4S$                                                                | $C_{15}H_{25}NO_3$                                                                  | $C_{14}H_{11}Cl_2NO_2$                                                              | $C_{14}H_{21}NO_4$                                                                  |
| Molecular Structure                | 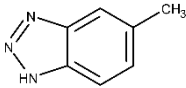 |  |  |  |  |
| CAS no.                            | 136-85-6                                                                          | 80-09-1                                                                           | 51384-51-1                                                                          | 15307-86-5                                                                          | 56392-14-4                                                                          |
| pKa                                | 8.5 (anionic form at pH > 8.5)                                                    | 7.3 (anionic at pH > 7.3)                                                         | 9.56 (cationic form at pH < 9.56)                                                   | 4.15 (anionic form at pH > 4.15)                                                    | 3.50 (cationic form at pH < 3.5; zwitterionic at pH 3.50-9.70; anionic at pH > 9.7) |
| log Kow                            | 1.89                                                                              | 1.65                                                                              | 1.88                                                                                | 4.51                                                                                | -1.5                                                                                |
| Molecular weight                   | 133.15                                                                            | 250.27                                                                            | 267.36                                                                              | 296.1                                                                               | 267.32                                                                              |
| Henry's law coefficient (at 25 °C) | $3.14 \times 10^{-7} \text{ atm m}^3 \text{ mol}^{-1}$                            | $2.7 \times 10^{-15} \text{ atm m}^3 \text{ mol}^{-1}$ at 25 °C                   | $2.1 \times 10^{-11} \text{ atm m}^3 \text{ mol}^{-1}$                              | $4.73 \times 10^{-12} \text{ atm m}^3 \text{ mol}^{-1}$                             |                                                                                     |
| Electrophilicity index             | pH 4.5                                                                            | 3.618                                                                             | 3.094                                                                               | 2.605                                                                               | 2.491                                                                               |
|                                    | pH 7.5                                                                            | 3.489                                                                             | 2.942                                                                               | 2.603                                                                               | 2.479                                                                               |
| Ionization potential               | pH 4.5                                                                            | 6.65                                                                              | 6.58                                                                                | 6.31                                                                                | 5.87                                                                                |
|                                    | pH 7.5                                                                            | 6.55                                                                              | 6.22                                                                                | 6.31                                                                                | 5.81                                                                                |
| References                         | 1                                                                                 | PubChem (accessed in March 2022); Fisher scientific (accessed in April 2022)      | PubChem (accessed in March 2022); Fisher scientific (accessed in April 2022)        | Fisher scientific (accessed in April 2022)                                          | Fisher scientific (accessed in April 2022)                                          |

Sources: PubChem (accessed in March 2023); MarvinSketch software

## ESI 2. Analysis of MnOx – detailed results

The EDX analysis of MnOx indicated the following content of 37.0% Mn, 6.7% Fe (by weight) (ESI4). Previously reported XRD analysis of this material showed that the predominant phases were pyrolusite ( $\text{MnO}_2$ , PDF card 01-071-0071 with major diffraction line at  $28.68^\circ 2\Theta$ ) and lithiophorite ( $(\text{Al,Li})\text{Mn}^{4+}\text{O}_2(\text{OH})_2$ , PDF card 00-041-1378 with major diffraction line at  $18.81^\circ 2\Theta$ ). The sample decomposition showed that more than 50% dry weight consisted of Mn. The point of zero charge ( $\text{pH}_{\text{pzc}}$ ) of the MnOx was 4.8 and for the sand it was 5.9<sup>2</sup>.

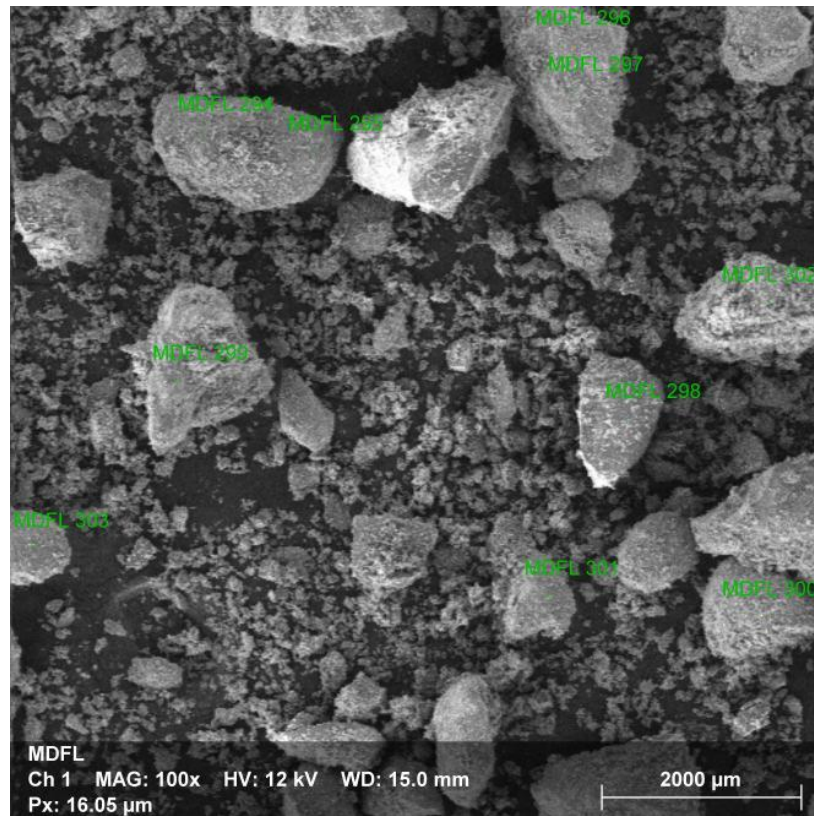

**Figure ESI 2.** SEM image with the indication of the analysed areas.

**Table ESI 2.** Elemental composition (normalized weight percentage) of the selected areas.

|          | C           | O            | Na          | AL          | Si          | K           | Ca          | Mn           | Fe          |
|----------|-------------|--------------|-------------|-------------|-------------|-------------|-------------|--------------|-------------|
| MDFL 294 | 1.00        | 5.51         |             | 3.83        | 3.88        |             | 3.82        | 34.46        | 9.50        |
| MDFL 295 | 1.34        | 21.89        | 0.45        | 7.11        | 4.49        | 1.23        |             | 35.47        | 7.23        |
| MDFL 296 |             | 9.05         |             |             | 3.80        | 1.36        |             | 47.11        | 8.19        |
| MDFL 297 | 1.59        | 24.91        |             |             | 2.20        |             |             | 34.80        |             |
| MDFL 298 | 2.42        | 45.42        |             |             | 39.53       |             |             |              |             |
| MDFL 299 | 1.94        | 26.20        | 0.51        | 2.31        | 1.50        | 2.30        |             | 50.46        |             |
| MDFL 300 | 3.14        | 33.06        |             |             | 1.73        |             |             | 29.28        | 4.08        |
| MDFL 301 | 1.54        | 21.60        | 0.58        | 4.06        | 3.46        | 0.92        |             | 39.36        | 6.85        |
| MDFL 302 | 1.61        | 35.48        | 2.52        | 4.59        | 11.35       |             | 1.14        | 23.86        | 3.79        |
| MDFL 303 | 1.28        | 17.31        | 0.88        | 6.15        | 4.05        | 1.15        |             | 38.68        | 7.18        |
| Mean     | <b>1.76</b> | <b>24.04</b> | <b>0.99</b> | <b>5.44</b> | <b>7.60</b> | <b>1.39</b> | <b>2.48</b> | <b>37.04</b> | <b>6.69</b> |

**ESI 3.** Configuration and photo of the experimental setup.

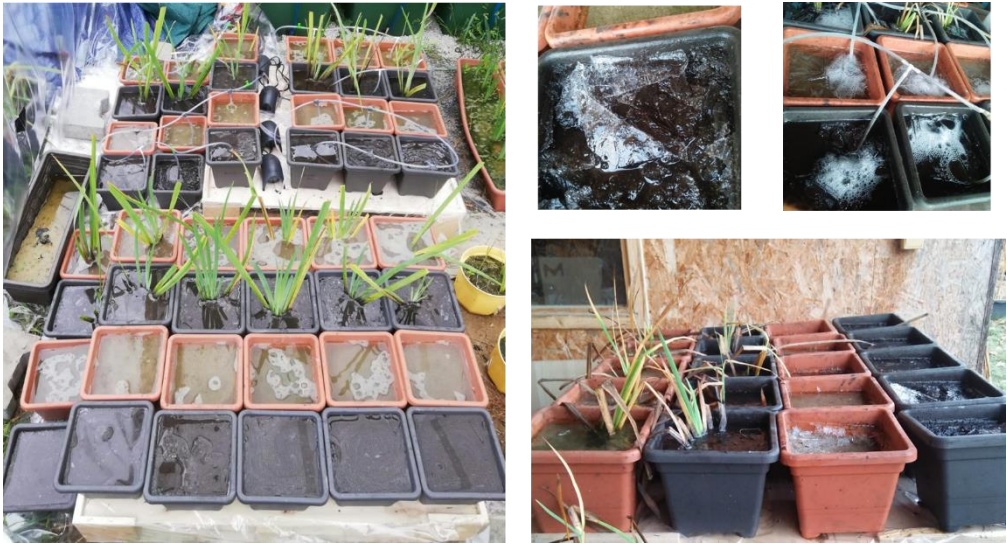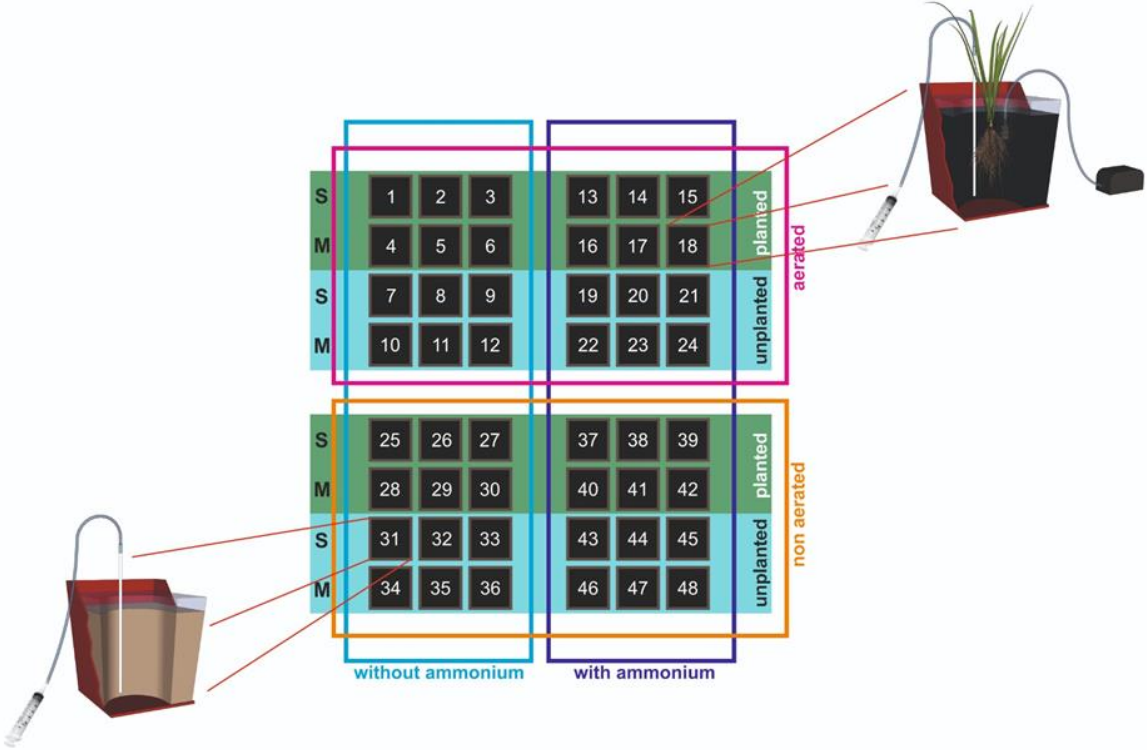

**ESI 4.** Temperature timeline of the study conducted for 84 days between September to December 2021 in an outdoor setting on the campus of Czech University of Life Sciences Prague. Red and yellow dots indicate the start and end of each batch, respectively.

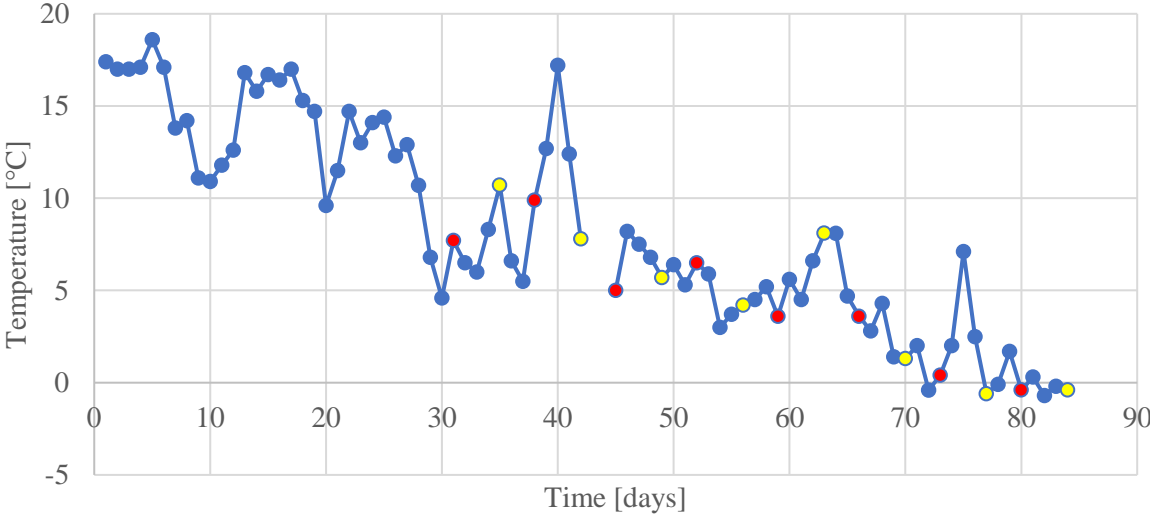

## ESI 5. Concentration and removal of standard parameters.

| Parameter           | Descript or | Influent   |            | Effluent |          |          |          |          |          |          |          |          |          |          |          |          |          |          |          |
|---------------------|-------------|------------|------------|----------|----------|----------|----------|----------|----------|----------|----------|----------|----------|----------|----------|----------|----------|----------|----------|
|                     |             | Inflow +Am | Inflow -Am | S+P+A+Am | S+P+A-Am | S+P-A+Am | S+P-A-Am | S-P+A+Am | S-P+A-Am | S-P-A+Am | S-P-A-Am | M+P+A+Am | M+P+A-Am | M+P-A+Am | M+P-A-Am | M-P+A+Am | M-P+A-Am | M-P-A+Am | M-P-A-Am |
| DOC                 | Median      | 16.27      | 16.55      | 16.25    | 15.79    | 23.03    | 26.56    | 17.58    | 18.55    | 20.15    | 18.32    | 7.90     | 8.34     | 10.09    | 10.75    | 10.33    | 8.09     | 9.51     | 9.52     |
|                     | MAD         | 0.59       | 0.93       | 2.31     | 3.28     | 4.26     | 8.08     | 1.42     | 3.30     | 1.84     | 2.19     | 1.64     | 1.29     | 0.99     | 0.81     | 1.02     | 1.33     | 0.47     | 1.38     |
|                     | Removal     |            |            | 0%       | 5%       | -42%     | -60%     | -8%      | -12%     | -24%     | -11%     | 51%      | 50%      | 38%      | 35%      | 37%      | 51%      | 42%      | 42%      |
| DIC                 | Median      | 9.26       | 9.43       | 17.18    | 10.57    | 37.86    | 51.65    | 7.72     | 6.27     | 19.85    | 20.39    | 0.51     | 0.00     | 0.98     | 2.51     | 0.00     | 0.00     | 0.00     | 0.00     |
|                     | MAD         | 0.82       | 0.75       | 8.44     | 2.20     | 6.43     | 15.08    | 4.36     | 5.65     | 1.23     | 1.83     | 0.51     | 0.00     | 0.98     | 1.57     | 0.00     | 0.00     | 0.00     | 0.00     |
|                     | Removal     |            |            | -86%     | -12%     | -309%    | -448%    | 17%      | 33%      | -114%    | -116%    | 95%      | 100%     | 89%      | 73%      | 100%     | 100%     | 100%     | 100%     |
| TN                  | Median      | 41.65      | 31.11      | 10.02    | 3.31     | 4.24     | 2.10     | 32.93    | 10.88    | 11.19    | 5.77     | 10.74    | 8.23     | 16.71    | 11.69    | 31.85    | 18.99    | 25.80    | 17.33    |
|                     | MAD         | 1.30       | 10.54      | 6.87     | 1.82     | 1.43     | 0.77     | 4.44     | 7.57     | 4.28     | 2.19     | 6.00     | 3.05     | 3.34     | 2.82     | 3.47     | 2.26     | 2.34     | 2.66     |
|                     | Removal     |            |            | 76%      | 89%      | 90%      | 93%      | 21%      | 65%      | 73%      | 81%      | 74%      | 74%      | 60%      | 62%      | 24%      | 39%      | 38%      | 44%      |
| N-NH <sub>4</sub>   | Median      | 30.72      | 20.98      | 3.58     | 1.32     | 2.75     | 0.93     | 21.69    | 5.81     | 7.47     | 3.94     | 6.44     | 4.21     | 8.13     | 5.53     | 17.82    | 8.11     | 9.44     | 5.36     |
|                     | MAD         | 29.71      | 19.54      | 3.38     | 1.20     | 1.40     | 0.73     | 6.06     | 4.41     | 4.90     | 1.89     | 4.50     | 1.98     | 4.87     | 2.28     | 5.54     | 3.87     | 6.38     | 3.33     |
|                     | Removal     |            |            | 88%      | 94%      | 91%      | 96%      | 29%      | 72%      | 76%      | 81%      | 79%      | 80%      | 74%      | 74%      | 42%      | 61%      | 69%      | 74%      |
| N-NO <sub>3</sub>   | Median      | 5.60       | 5.72       | 0.44     | 0.39     | 0.22     | 0.18     | 5.17     | 1.16     | 0.28     | 0.30     | 2.03     | 2.78     | 3.27     | 3.18     | 9.93     | 8.60     | 8.59     | 8.67     |
|                     | MAD         | 0.95       | 0.62       | 0.38     | 0.37     | 0.17     | 0.17     | 0.61     | 1.12     | 0.18     | 0.26     | 1.18     | 1.07     | 0.65     | 0.72     | 2.03     | 1.18     | 1.23     | 0.76     |
| N-NO <sub>2</sub>   | Median      | 0.01       | 0.02       | 0.02     | 0.01     | 0.00     | 0.00     | 0.08     | 0.04     | 0.00     | 0.00     | 0.00     | 0.00     | 0.01     | 0.02     | 0.00     | 0.00     | 0.00     | 0.01     |
|                     | MAD         | 0.01       | 0.02       | 0.02     | 0.01     | 0.00     | 0.00     | 0.08     | 0.04     | 0.00     | 0.00     | 0.00     | 0.00     | 0.00     | 0.01     | 0.00     | 0.00     | 0.00     | 0.00     |
| Fluoride            | Median      | 0.11       | 0.11       | 0.19     | 0.18     | 0.15     | 0.16     | 0.22     | 0.22     | 0.20     | 0.19     | 0.03     | 0.03     | 0.02     | 0.02     | 0.02     | 0.03     | 0.03     | 0.02     |
|                     | MAD         | 0.02       | 0.03       | 0.02     | 0.03     | 0.04     | 0.04     | 0.02     | 0.03     | 0.01     | 0.02     | 0.01     | 0.01     | 0.00     | 0.00     | 0.00     | 0.01     | 0.01     | 0.01     |
| Chloride            | Median      | 97.94      | 75.29      | 109.35   | 96.10    | 145.78   | 113.43   | 122.47   | 90.50    | 118.56   | 96.46    | 138.34   | 107.55   | 133.05   | 111.84   | 129.12   | 100.89   | 117.34   | 103.52   |
|                     | MAD         | 9.86       | 6.26       | 19.22    | 11.55    | 5.14     | 11.18    | 6.37     | 17.64    | 4.60     | 5.05     | 15.11    | 10.02    | 8.65     | 10.79    | 4.43     | 6.22     | 4.51     | 5.31     |
| Phosphate           | Median      | 2.35       | 2.71       | 0.05     | 0.05     | 0.05     | 0.05     | 0.05     | 0.05     | 0.05     | 0.05     | 0.05     | 0.05     | 0.05     | 0.05     | 0.05     | 0.05     | 0.05     | 0.05     |
|                     | MAD         | 1.68       | 1.40       | 0.00     | 0.00     | 0.00     | 0.00     | 0.00     | 0.00     | 0.00     | 0.00     | 0.00     | 0.00     | 0.00     | 0.00     | 0.00     | 0.00     | 0.00     | 0.00     |
| Sulphate            | Median      | 39.30      | 39.63      | 60.11    | 83.23    | 101.28   | 84.97    | 69.56    | 72.09    | 116.29   | 172.42   | 45.90    | 46.43    | 40.36    | 60.15    | 21.49    | 29.72    | 18.02    | 32.40    |
|                     | MAD         | 8.55       | 5.50       | 21.24    | 20.29    | 76.00    | 44.60    | 11.94    | 44.98    | 29.42    | 55.46    | 3.89     | 4.24     | 4.04     | 3.96     | 5.99     | 6.58     | 6.38     | 10.23    |
| Mn total, dissolved | Median      | 0.02       | 0.02       | 1.54     | 0.82     | 7.01     | 5.95     | 0.25     | 0.27     | 6.64     | 3.85     | 1.06     | 0.04     | 0.30     | 0.04     | 0.05     | 0.02     | 0.09     | 0.29     |
|                     | MAD         | 0.01       | 0.02       | 0.03     | 0.16     | 1.89     | 0.37     | 0.06     | 0.04     | 1.89     | 0.71     | 1.14     | 0.01     | 0.15     | 0.01     | 0.02     | 0.01     | 0.02     | 0.10     |
| Fe total, dissolved | Median      | 0.10       | 0.11       | 1.63     | 0.05     | 7.33     | 7.88     | 0.02     | 0.15     | 6.16     | 1.78     | 0.03     | 0.01     | 0.11     | 0.15     | 0.01     | 0.01     | 0.11     | 0.10     |
|                     | MAD         | 0.02       | 0.01       | 1.27     | 0.02     | 6.13     | 0.09     | 0.01     | 0.16     | 3.17     | 0.77     | 0.04     | 0.01     | 0.05     | 0.01     | 0.01     | 0.02     | 0.05     | 0.01     |
| pH                  | Median      | 7.31       | 7.29       | 6.91     | 7.19     | 7.03     | 7.14     | 7.12     | 7.12     | 7.04     | 7.14     | 5.74     | 5.97     | 5.81     | 5.96     | 5.46     | 5.65     | 5.48     | 5.72     |
|                     | MAD         | 0.06       | 0.13       | 0.13     | 0.16     | 0.12     | 0.11     | 0.19     | 0.10     | 0.21     | 0.11     | 0.17     | 0.16     | 0.19     | 0.19     | 0.15     | 0.07     | 0.19     | 0.16     |

Abbreviations: MAD – median absolute deviation; DOC - dissolved organic carbon; DIC – dissolved inorganic carbon; TN – total nitrogen.



## ESI 6. Concentration and average removal efficiencies of the organic contaminants

| Parameter | Descriptor | Influents  |            | Effluents |          |          |          |          |          |          |          |          |          |          |          |          |          |          |       |
|-----------|------------|------------|------------|-----------|----------|----------|----------|----------|----------|----------|----------|----------|----------|----------|----------|----------|----------|----------|-------|
|           |            | Inflow +Am | Inflow -Am | S+P+A-Am  | S-P+A-Am | S+P+A+Am | S-P+A+Am | S+P-A-Am | S-P-A-Am | S+P-A+Am | S-P-A+Am | M+P+A-Am | M-P+A-Am | M+P+A+Am | M-P+A+Am | M-P-A-Am | M+P-A+Am | M-P-A+Am |       |
| 5MBTR     | Conc. AV   | 4.04       | 4.06       | 2.28      | 3.79     | 2.37     | 4.37     | 1.45     | 2.76     | 1.60     | 2.67     | 2.82     | 3.75     | 1.98     | 5.33     | 2.98     | 4.15     | 2.89     | 4.97  |
|           | Conc. SD   | 0.16       | 0.18       | 0.60      | 0.51     | 0.83     | 0.30     | 0.61     | 3.66     | 0.57     | 0.82     | 0.62     | 0.59     | 0.85     | 0.65     | 0.49     | 0.89     | 0.75     | 0.38  |
|           | Removal AV |            |            | 44.1      | 7.1      | 42.2     | -6.8     | 64.6     | 33.0     | 61.1     | 34.8     | 31.1     | 8.4      | 51.6     | -30.0    | 27.1     | -1.8     | 29.4     | -21.3 |
|           | Removal SD |            |            | 13.5      | 11.8     | 9.3      | 11.9     | 14.4     | 17.8     | 6.1      | 12.7     | 11.8     | 8.0      | 45.3     | 22.7     | 11.0     | 14.7     | 18.8     | 10.4  |
| BPS       | Conc. AV   | 4.65       | 4.75       | 1.40      | 2.93     | 1.42     | 3.16     | 1.10     | 1.17     | 1.07     | 1.78     | 2.25     | 2.70     | 1.48     | 3.94     | 2.70     | 3.55     | 2.66     | 4.12  |
|           | Conc. SD   | 0.67       | 0.65       | 0.84      | 1.11     | 0.94     | 1.61     | 0.59     | 0.71     | 0.61     | 0.85     | 0.95     | 1.40     | 0.95     | 1.96     | 1.03     | 1.38     | 1.15     | 1.51  |
|           | Removal AV |            |            | 71.7      | 40.8     | 70.7     | 34.7     | 77.8     | 76.4     | 72.4     | 63.2     | 54.5     | 45.6     | 69.5     | 18.9     | 45.4     | 37.7     | 43.7     | 14.6  |
|           | Removal SD |            |            | 13.9      | 14.8     | 19.5     | 27.3     | 16.1     | 17.9     | 27.9     | 39.2     | 9.8      | 19.4     | 13.5     | 23.2     | 12.6     | 22.0     | 16.3     | 30.6  |
| MTP       | Conc. AV   | 1.87       | 1.90       | 0.31      | 0.25     | 0.28     | 0.63     | 0.14     | 0.12     | 0.10     | 0.23     | 1.38     | 1.30     | 1.17     | 1.58     | 1.47     | 1.45     | 1.60     | 1.47  |
|           | Conc. SD   | 0.39       | 0.39       | 0.27      | 0.23     | 0.33     | 0.18     | 0.16     | 0.15     | 0.13     | 0.25     | 0.30     | 0.29     | 0.47     | 0.20     | 0.33     | 0.50     | 0.40     | 0.23  |
|           | Removal AV |            |            | 84.4      | 87.4     | 85.6     | 67.1     | 93.1     | 93.9     | 95.0     | 87.8     | 29.3     | 33.5     | 39.6     | 17.4     | 24.4     | 26.0     | 16.6     | 22.7  |
|           | Removal SD |            |            | 12.8      | 13.6     | 10.3     | 11.9     | 12.8     | 17.8     | 8.8      | 12.3     | 6.5      | 13.9     | 6.4      | 23.1     | 5.4      | 18.2     | 9.6      | 16.6  |
| DCF       | Conc. AV   | 4.74       | 4.81       | 1.89      | 2.49     | 1.67     | 2.78     | 1.09     | 0.94     | 0.98     | 1.60     | 0.03     | 0.06     | 0.13     | 0.04     | 0.04     | 0.03     | 0.09     | 0.02  |
|           | Conc. SD   | 0.38       | 0.37       | 0.86      | 1.24     | 1.13     | 1.42     | 0.70     | 0.76     | 0.58     | 0.90     | 0.09     | 0.11     | 0.27     | 0.07     | 0.07     | 0.07     | 0.18     | 0.03  |
|           | Removal AV |            |            | 61.4      | 49.3     | 65.4     | 42.4     | 77.7     | 80.9     | 79.7     | 67.0     | 99.4     | 98.9     | 97.4     | 99.3     | 99.2     | 99.3     | 98.2     | 99.7  |
|           | Removal SD |            |            | 15.7      | 1.5      | 21.5     | 2.0      | 21.1     | 3.6      | 27.7     | 1.4      | 12.2     | 1.2      | 14.3     | 0.8      | 9.4      | 2.3      | 16.8     | 0.5   |

Abbreviations: 5MBTR, 5-Methylbenzotriazole; BPS, Bisphenol S; MTP, Metoprolol; DCF, Diclofenac.

## ESI 7. Micropollutants removal (%) per sampling batch upon the single effect of variables

(Mean±SE)

| DCF   |             |             |             |             |             |             |             |             |
|-------|-------------|-------------|-------------|-------------|-------------|-------------|-------------|-------------|
| Batch | Media*      |             | Plant       |             | Aeration*   |             | Ammonium    |             |
|       | S           | M           | +P          | -P          | +A          | -A          | +Am         | -Am         |
| 1     | 84.61±2.09  | 97.45±1.26  | 91.65±2.6   | 90.41±3.29  | 87.92±3.24  | 94.14±2.11  | 90.05±3.02  | 92.01±2.88  |
| 2     | 74.26±3.15  | 96.91±0.84  | 85.04±4.66  | 86.12±5.04  | 82.93±4.97  | 88.24±4.54  | 85.83±4.66  | 85.33±5.05  |
| 3     | 77.79±3.81  | 100±0       | 89.74±4.08  | 88.05±5.73  | 85.62±5.92  | 92.17±3.41  | 89.26±4.14  | 88.53±5.71  |
| 4     | 65.45±6.59  | 99.55±0.42  | 85.8±5.41   | 79.21±9.71  | 76.95±9.85  | 88.05±4.55  | 79.32±9.32  | 85.69±6.07  |
| 5     | 82.86±5.49  | 100±0       | 95.06±3.03  | 87.80±6.18  | 85.75±6.27  | 97.1±1.62   | 91.28±5.02  | 91.58±5.1   |
| 6     | 54.54±7.97  | 99.73±0.21  | 82.01±7.43  | 72.26±12.14 | 68.61±12.45 | 85.66±5.8   | 75.61±10.83 | 78.66±9.57  |
| 7     | 43.44±6.35  | 98.24±0.84  | 73.86±9.25  | 67.83±12.94 | 64.37±13.59 | 77.32±7.67  | 69.27±11.84 | 72.42±10.7  |
| 8     | 40.73±8.32  | 99.36±0.44  | 75.07±10.28 | 67.83±12.94 | 61.3±14.95  | 78.8±8.34   | 68.33±13.35 | 71.76±11.66 |
| SMBTR |             |             |             |             |             |             |             |             |
| Batch | Media*      |             | Plant*      |             | Aeration    |             | Ammonium    |             |
|       | S           | M           | +P          | -P          | +A          | -A          | +Am         | -Am         |
| 1     | 58.73±10.49 | 26.20±12.14 | 62.13±7.03  | 22.8±13.16  | 36.15±12.03 | 48.79±13.3  | 38.19±15.5  | 46.75±9.35  |
| 2     | 26.67±16.74 | 20.5±11.58  | 49.78±5.09  | -2.61±13.98 | 28.28±12.16 | 18.89±16.22 | 28.76±13.82 | 18.41±14.79 |
| 3     | 40.58±11.74 | 2.57±14     | 44.56±7.85  | -1.41±14.98 | 13±14.1     | 30.14±14.74 | 12.69±16.78 | 30.46±11.54 |
| 4     | 37.33±9.99  | 14.62±9.89  | 45.60±5.41  | 6.36±9.76   | 223±10.72   | 29.94±10.73 | 17.27±12.4  | 34.69±7.68  |
| 5     | 38.84±8.67  | 18.79±9.88  | 48.85±4.87  | 8.78±8.06   | 21.25±9.99  | 36.38±9.34  | 25.62±11.76 | 32±7.89     |
| 6     | 35.41±9.09  | 14.46±8.27  | 44.12±5.15  | 5.74±7.12   | 15.17±8.32  | 34.69±9.27  | 21.62±10.65 | 28.24±8.12  |
| 7     | 23.23±6.84  | 0.9±7.51    | 28.12±4.6   | -3.99±6.64  | 6.96±7.52   | 17.16±8.65  | 8.08±9.33   | 16.05±6.88  |
| 8     | 19.37±8.5   | -3.71±10.77 | 27.97±6.22  | -12.3±8.47  | 4.86±7.15   | 10.8±13.14  | 8.66±10.19  | 7±11.05     |
| MTP   |             |             |             |             |             |             |             |             |
| Batch | Media*      |             | Plant       |             | Aeration    |             | Ammonium    |             |
|       | S           | M           | +P          | -P          | +A          | -A          | +Am         | -Am         |
| 1     | 98.4±1.6    | 48±5.57     | 73.81±11.15 | 72.59±9.52  | 76.46±8.58  | 69.94±11.76 | 71.84±10.57 | 74.56±10.14 |
| 2     | 95.6±3.53   | 31.59±3.95  | 62.73±14.24 | 64.46±10.85 | 63.07±12.08 | 64.11±13.22 | 59.83±12.44 | 67.35±12.72 |
| 3     | 95.6±4.4    | 16.96±6.87  | 56.31±17.47 | 56.25±14.25 | 57.67±14.13 | 54.89±17.55 | 52.85±16.03 | 59.71±15.75 |
| 4     | 81.18±4.72  | 13.27±5.8   | 54.12±13.07 | 40.32±14.17 | 47.12±10.91 | 47.32±16.31 | 41.27±15    | 53.18±12.25 |
| 5     | 85.17±2.95  | 38.39±2.72  | 65.02±8.89  | 58.54±9.5   | 58.21±8.51  | 65.35±9.82  | 60.62±8.95  | 62.94±9.59  |
| 6     | 86.32±3.6   | 31.94±2.73  | 62.45±9.99  | 55.82±11.34 | 52.79±10    | 65.47±10.95 | 58.25±10.64 | 60±10.87    |
| 7     | 74.37±3.04  | 11.56±1.91  | 43.09±12.59 | 42.83±11.66 | 41±10.16    | 44.92±13.79 | 41.08±11.98 | 44.84±12.25 |
| 8     | 77.6±3.63   | 17.87±6.68  | 50.42±11.05 | 45.04±13.72 | 47.95±8.62  | 47.51±15.43 | 46.04±11.57 | 49.41±13.33 |
| BPS   |             |             |             |             |             |             |             |             |
| Batch | Media*      |             | Plant*      |             | Aeration    |             | Ammonium    |             |
|       | S           | M           | +P          | -P          | +A          | -A          | +Am         | -Am         |
| 1     | 69.64±5.88  | 42.26±8.96  | 69.2±5.72   | 42.7±9.25   | 55.57±9.12  | 56.33±9.22  | 52.53±10.91 | 59.37±6.79  |
| 2     | 64.29±7.37  | 33.26±9.38  | 62.73±6.12  | 34.81±10.86 | 47.49±10.85 | 50.05±9.63  | 44.22±12.12 | 53.33±7.63  |
| 3     | 68.31±6.3   | 20.16±10.87 | 59.08±7.95  | 29.38±14.04 | 44.02±12.52 | 44.44±12.91 | 41.4±14.72  | 47.07±10.22 |
| 4     | 58.16±8.57  | 56.2±12.86  | 63.81±7.49  | 50.56±13.06 | 67.9±10.74  | 46.46±9.55  | 50.93±12.96 | 63.44±7.74  |
| 5     | 96.44±1.68  | 88.7±2.3    | 94.6±1.53   | 90.54±2.98  | 88.84±2.58  | 96.3±1.32   | 92.53±2.82  | 92.61±2.11  |
| 6     | 57.57±7.8   | 35.43±6.38  | 60.1±4.63   | 32.94±7.91  | 37.95±7.79  | 55.05±7.42  | 42.24±9.38  | 50.76±6.59  |
| 7     | 48.63±5.89  | 26.56±5.64  | 48.33±4.73  | 26.85±6.78  | 33.23±6.66  | 41.95±7.18  | 32.72±7.94  | 42.46±5.61  |
| 8     | 44.75±6.96  | 27.31±6.05  | 47.88±5.22  | 24.17±6.28  | 31.46±6.26  | 40.6±7.85   | 31.08±7.66  | 40.98±6.42  |

note: \* indicates the significance of the single effect.

**ESI 8.** Timeline of the effluent concentrations (orange line - BPS, grey line – MTP, yellow line – DCF; blue line – 5MBTR; y-axis shows concentration [mg/L])

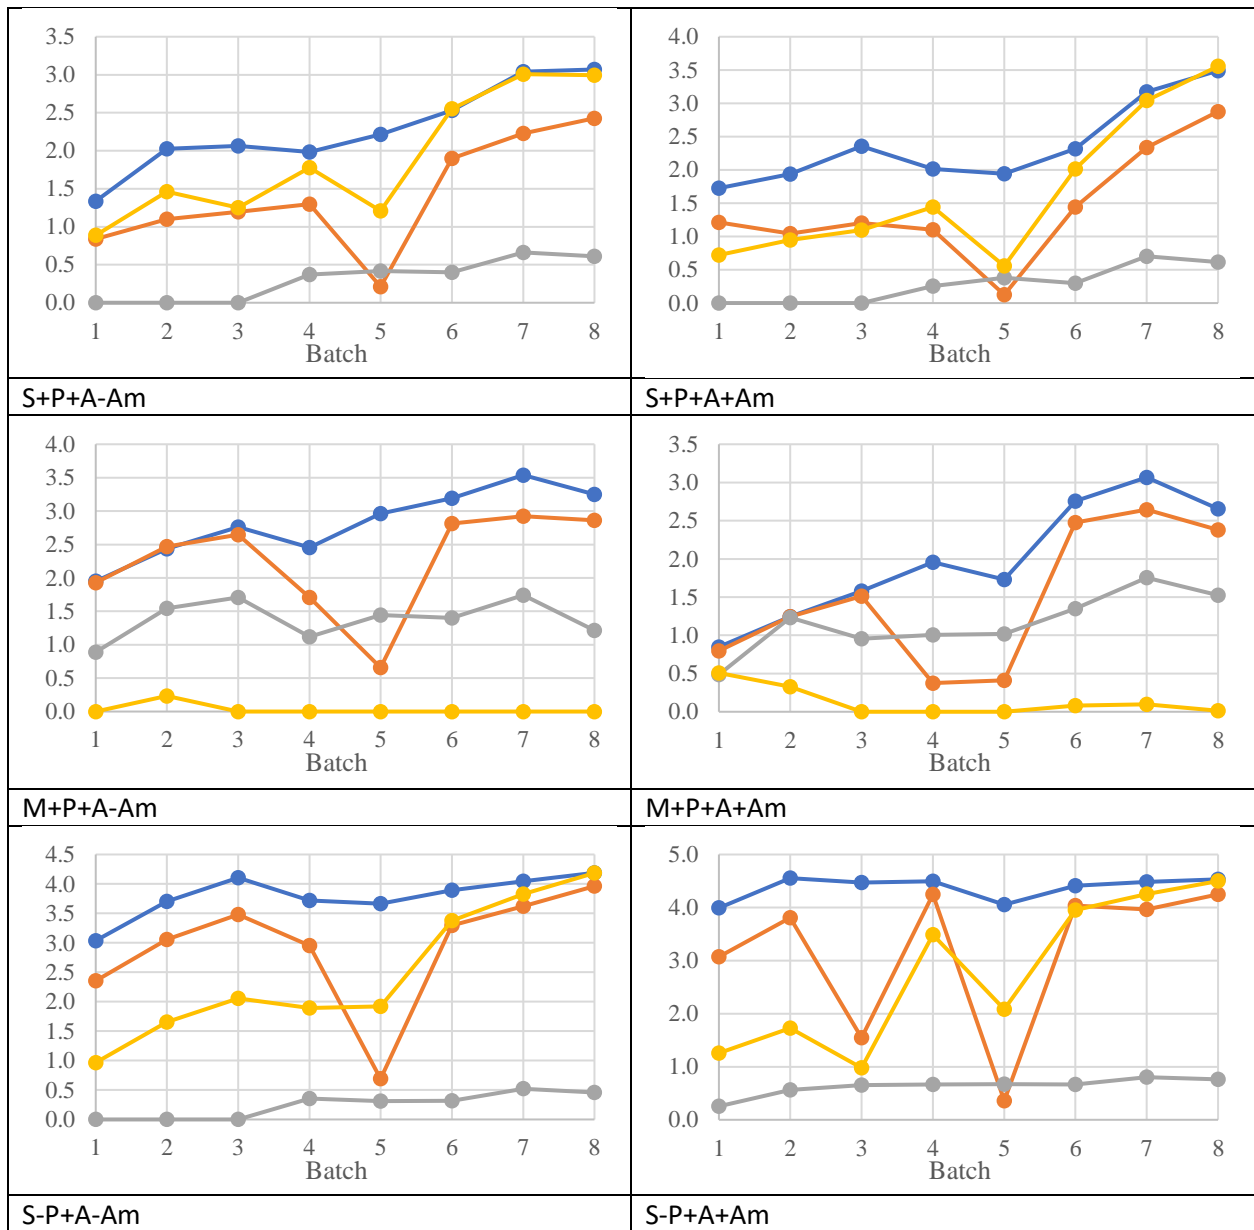

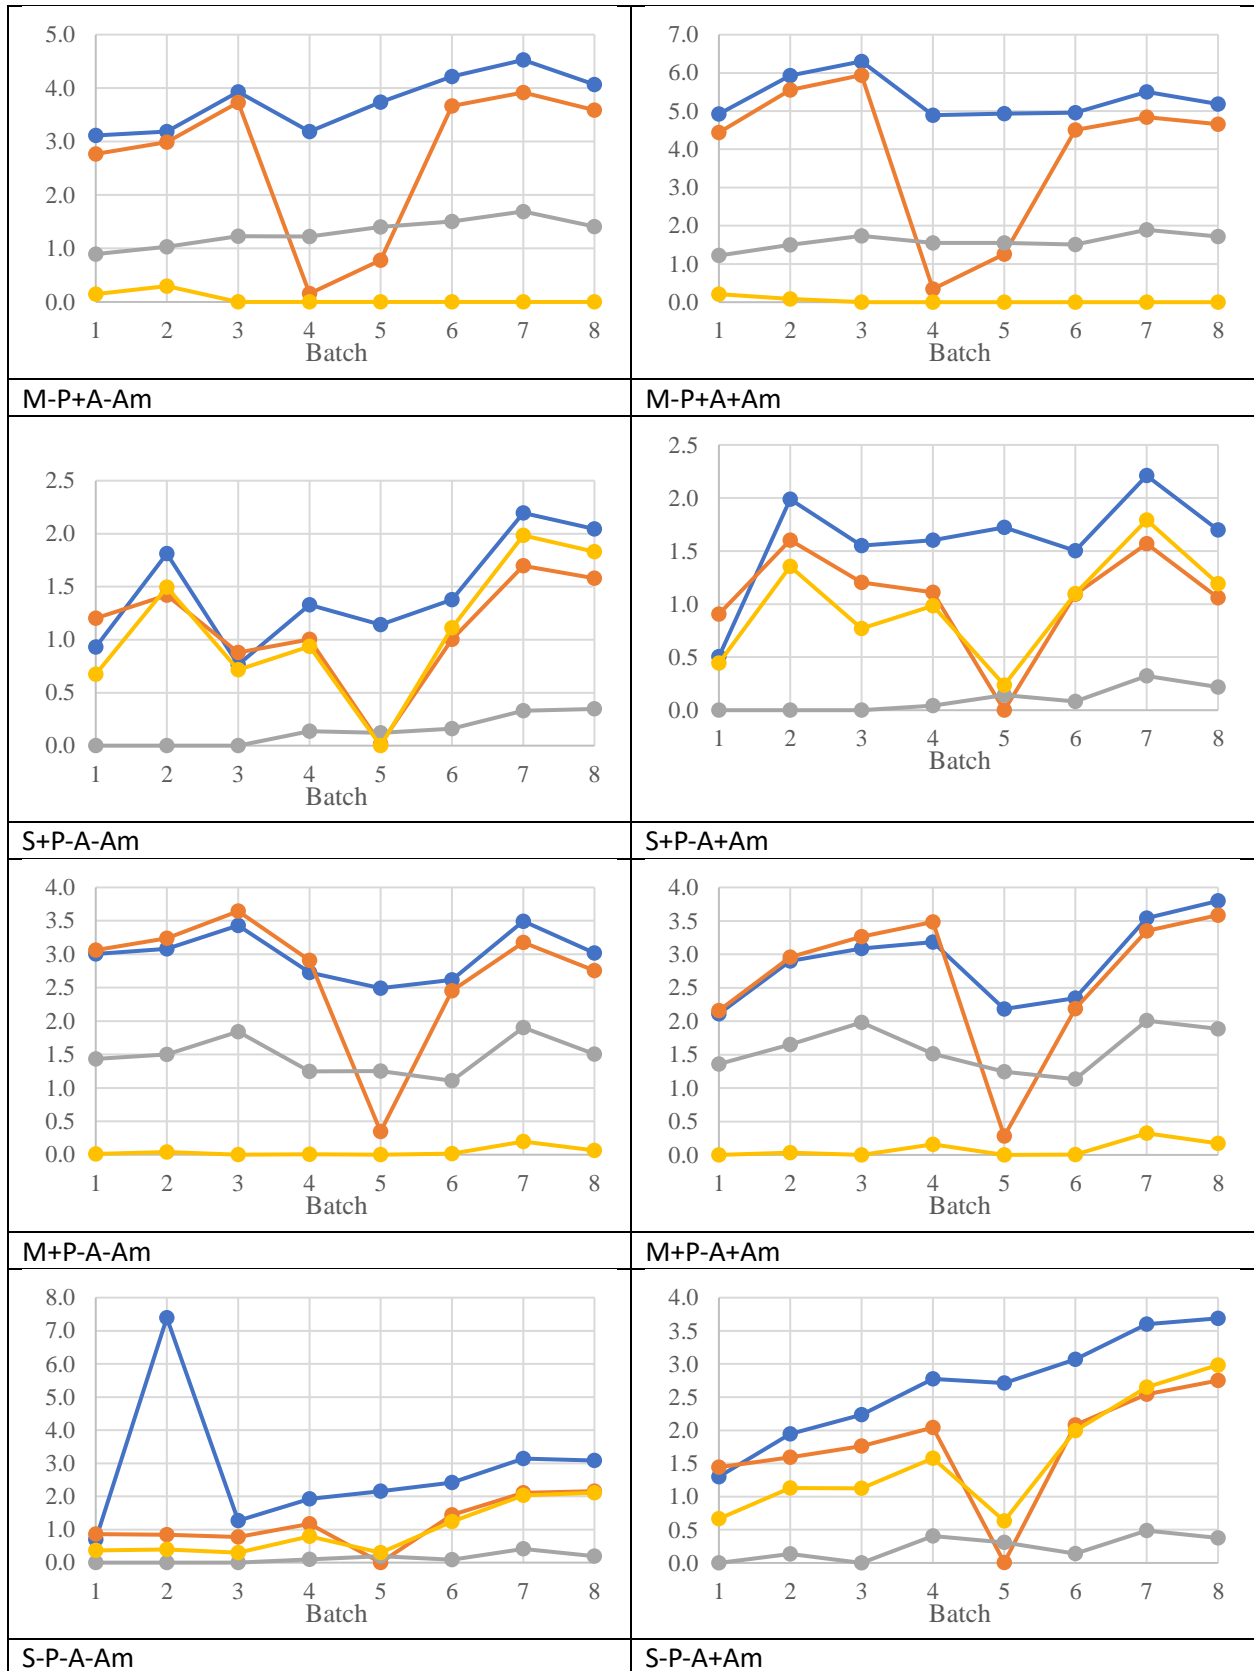

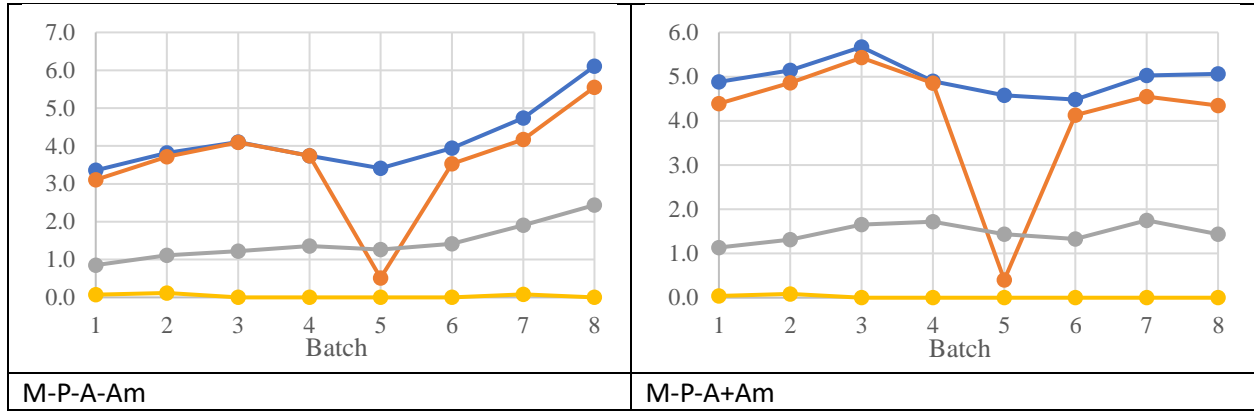

**ESI 9.** Resilience descriptors for the studied treatment based on the removal efficiency of DCF, 5MBTR, MTP and BPS (the two lowest values for each measure of resilience are given in bold)

|                 | Differences in removal |                     | Variance     |
|-----------------|------------------------|---------------------|--------------|
|                 | Min and max value      | Start and end value |              |
| S+P+A-Am        | 41.3                   | 37.7                | 224.3        |
| M+P+A-Am        | 33.4                   | 17.7                | 156.0        |
| S-P+A-Am        | 47.4                   | 38.4                | 295.4        |
| M-P+A-Am        | 36.9                   | 18.3                | 294.8        |
| S+P+A+Am        | 48.7                   | 41.3                | 307.1        |
| M+P+A+Am        | 42.4                   | 34.8                | 276.0        |
| S-P+A+Am        | 50.8                   | 32.0                | 474.8        |
| M-P+A+Am        | 51.4                   | 9.7                 | 528.8        |
| S+P-A-Am        | <b>30.9</b>            | 19.5                | <b>121.5</b> |
| M+P-A-Am        | 34.8                   | <b>3.7</b>          | 181.0        |
| S-P-A-Am        | 64.6                   | 33.2                | 708.2        |
| M-P-A-Am        | 58.7                   | 44.0                | 455.0        |
| <b>S+P-A+Am</b> | <b>32.7</b>            | 18.2                | <b>113.2</b> |
| M+P-A+Am        | 42.0                   | 26.5                | 296.1        |
| S-P-A+Am        | 47.2                   | 37.6                | 284.6        |
| M-P-A+Am        | 50.5                   | <b>5.3</b>          | 376.7        |

### ESI 10. Identity confirmation for metoprolol acid

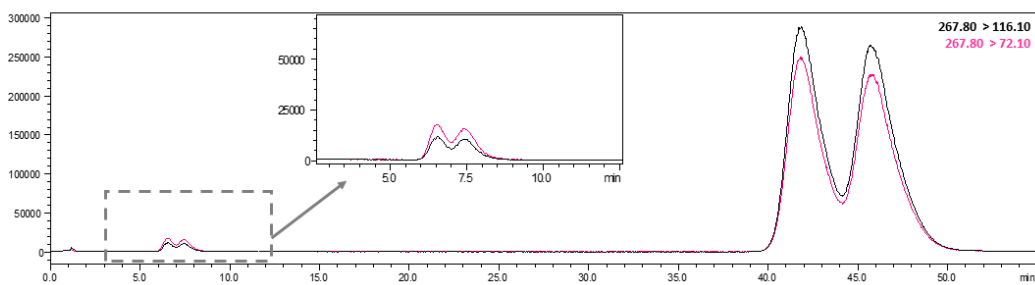

### ESI 11. Peak areas of metoprolol acid

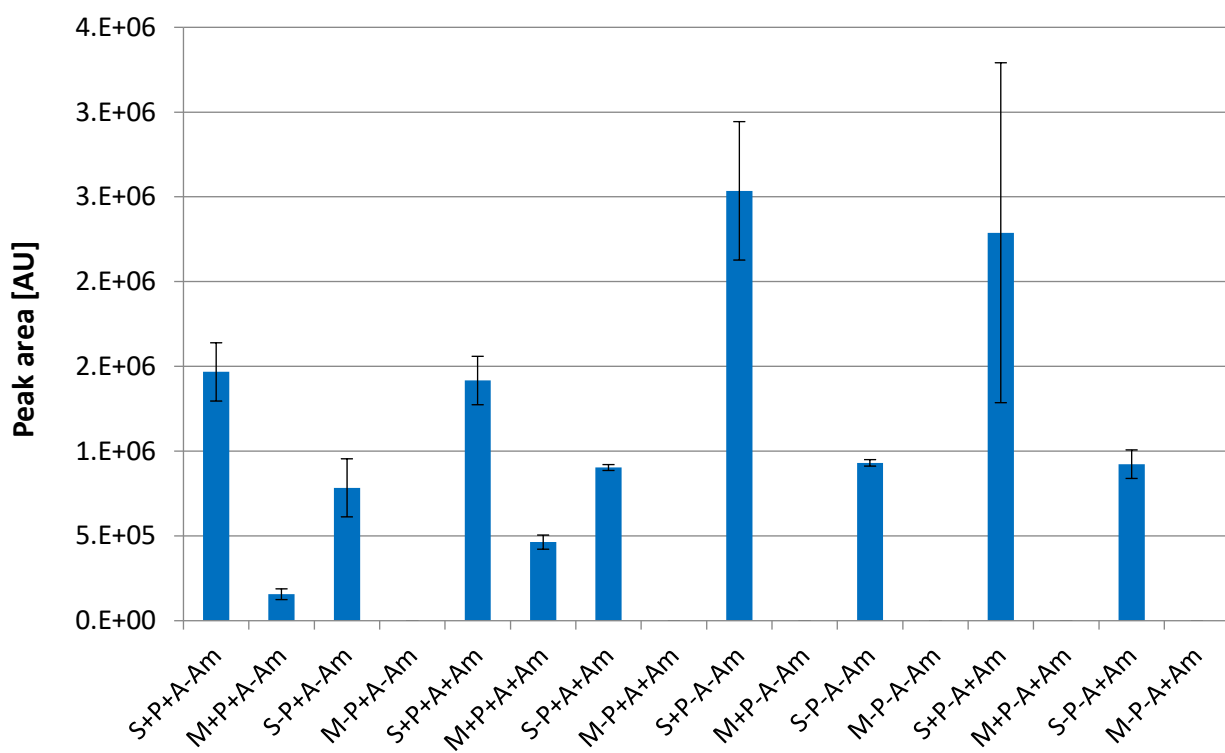

### ESI 12. Abiotic removal of MTPA

| Material | Temperature | Removal, % |
|----------|-------------|------------|
| Sand     | 4 °C        | 1          |
|          | 20 °C       | 1          |
| MnOx     | 4 °C        | 30         |
|          | 20 °C       | 50         |

## References

- 1 M. D. Alotaibi, B. M. Patterson, A. J. McKinley, A. Y. Reeder and A. J. Furness, Benzotriazole and 5-methylbenzotriazole in recycled water, surface water and dishwashing detergents from Perth, Western Australia: Analytical method development and application, *Environ. Sci. Process. Impacts*, 2015, **17**, 448–457.
- 2 A. Sochacki, K. Kowalska, E. Felis, S. Bajkacz, J. Kalka, A. Brzeszkiewicz, Z. Vaňková and A. Jakóbi-Kolon, Removal and transformation of sulfamethoxazole in acclimated biofilters with various operation modes—Implications for full-scale application, *Chemosphere*, 2021, **280**, 130638.
